# Supplementary material for: Computational insights into novel benzenesulfonamide-1,3,4-thiadiazole hybrids as a possible VEGFR-2 inhibitor: design, synthesis and anticancer evaluation with molecular dynamics studies
Source: Royal Society of Chemistry journal article supplement (doi:10.1039/d3nj04266a), 2023-01-01
Supplement: d3nj04266a1.pdf [file d3nj04266a1.pdf]

## Supplementary Data

### Computational insights of novel benzenesulfonamide-1,3,4-thiadiazole hybrids as VEGFR-2 inhibitor: Design, synthesis and anticancer evaluation with molecular dynamics studies

Samir Bondock<sup>\*,a</sup>, Tallah Albarqi<sup>a</sup>, Moaz M. Abdou<sup>b</sup>, Nada M. Mohamed<sup>c</sup>

<sup>a</sup>Chemistry Department, Faculty of Science, King Khalid University, 9004 Abha, Saudi Arabia

<sup>b</sup>Egyptian Petroleum Research Institute, Nasr City, 11727, Cairo, Egypt

<sup>c</sup>Pharmaceutical Chemistry Department, Faculty of Pharmacy, Modern University for Technology and Information, MTI, Cairo, Egypt.

**\*Corresponding author:** Samir Bondock (Email: [bondock@kku.edu.sa](mailto:bondock@kku.edu.sa), [bondock@mans.edu.eg](mailto:bondock@mans.edu.eg))

## **1. Materials and instrumentation**

- 1) All melting points were determined on Stuart SMP11 apparatus and were uncorrected.
- 2) The IR spectra were recorded in KBr discs, on a Jasco FT/IR-460 plus spectrophotometer at College of Science, King Khalid University.
- 3) The  $^1\text{H}$ - and  $^{13}\text{C}$ -NMR spectra were recorded in  $\text{DMSO-d}_6$  at 850 MHz on a BrukerAvanceAV-850 NMR Ultrashield™ spectrometer at King Abdulaziz University, Jeddah, Saudi Arabia.
- 4) Mass spectra were measured using the Shimadzu GC/MS-QP 1000 EX mass spectrometer at 70 eV, at the Micro Analytical Center, Cairo University, Giza, Egypt.
- 5) Elemental analyses were carried out at the Micro Analytical Center, Cairo University, Giza, Egypt.
- 6) Biological activities testing was carried out at the Holding Company for Biological Products and Vaccines, VACSERA, Giza, Egypt.

### **Supplementary S1. Molecular dynamic simulation:**

NAMD 3.0.0 employing CHARMM-36 forcefield was used during MD simulation. Protein system construction and preparation were performed following the reported procedures utilizing the QwikMD component within VDW software pertained to reconstructing missing hydrogens under  $\text{pH}=7.4$  conditions, followed by removing existing co-crystallized water molecules. Following that procedure involved putting the protein structure within an orthorhombic enclosure infused with TIP3P water combined with aqueous buffer spanning up till 20 Å encompassing sodium ( $\text{Na}^+$ ) as well as chloride ( $\text{Cl}^-$ ) ions both attaining concentrations measuring around 0. The next step involved the preparation of systems following which they underwent an energetically minimized state and then equilibrated for a period of 5 nano-seconds, so for starting the simulation process of protein-ligand complexes of **8c** and **8e** we used their top-scored conformations. The constraints and topologies of both derivatives were calculated by VMD plugin ForceField Toolkit (ffTK). The generated files were loaded to VMD to readily recite the protein–ligand complexes without errors and then conduct the simulation steps.

## Supplementary S2. Binding free energy calculation

Binding free energy was calculated for docked complexes using MM-PBSA within MMPBSA.py module integrated with AMBER18 software package. An estimate of the system's net energy was obtained by using this equation and analysing data from processing 100 frames of the total trajectories.

$$\Delta G_{\text{Binding}} = \Delta G_{\text{Complex}} - \Delta G_{\text{Receptor}} - \Delta G_{\text{Inhibitor}}$$

The previous terms required multiple calculations involving Van der Waals forces and electrostatics; this term also needs an accurate calculation for internal energies derived through mechanism with a polar contribution towards solvation.

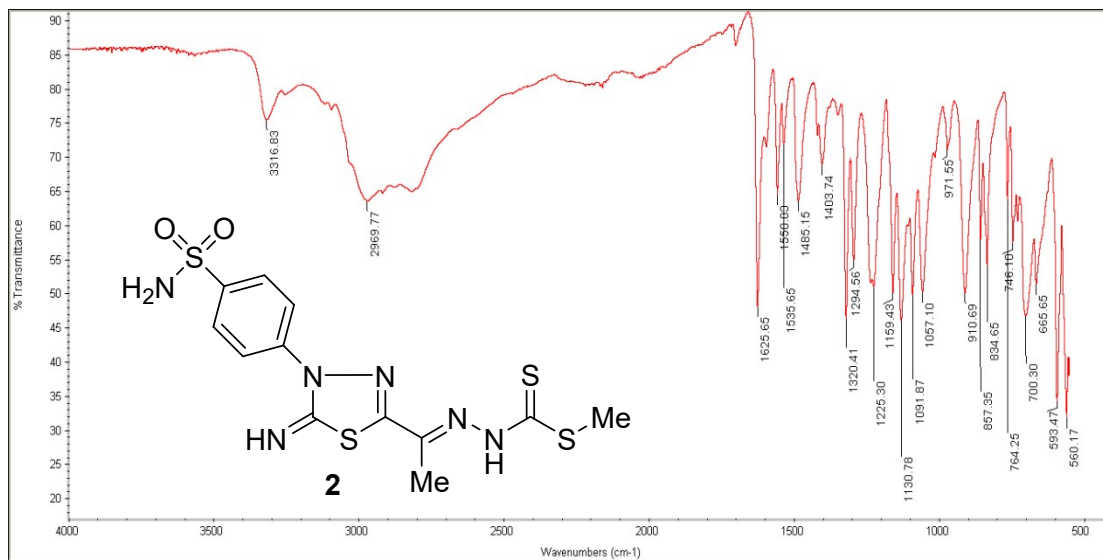

Figure S1. IR spectrum of compound 2.

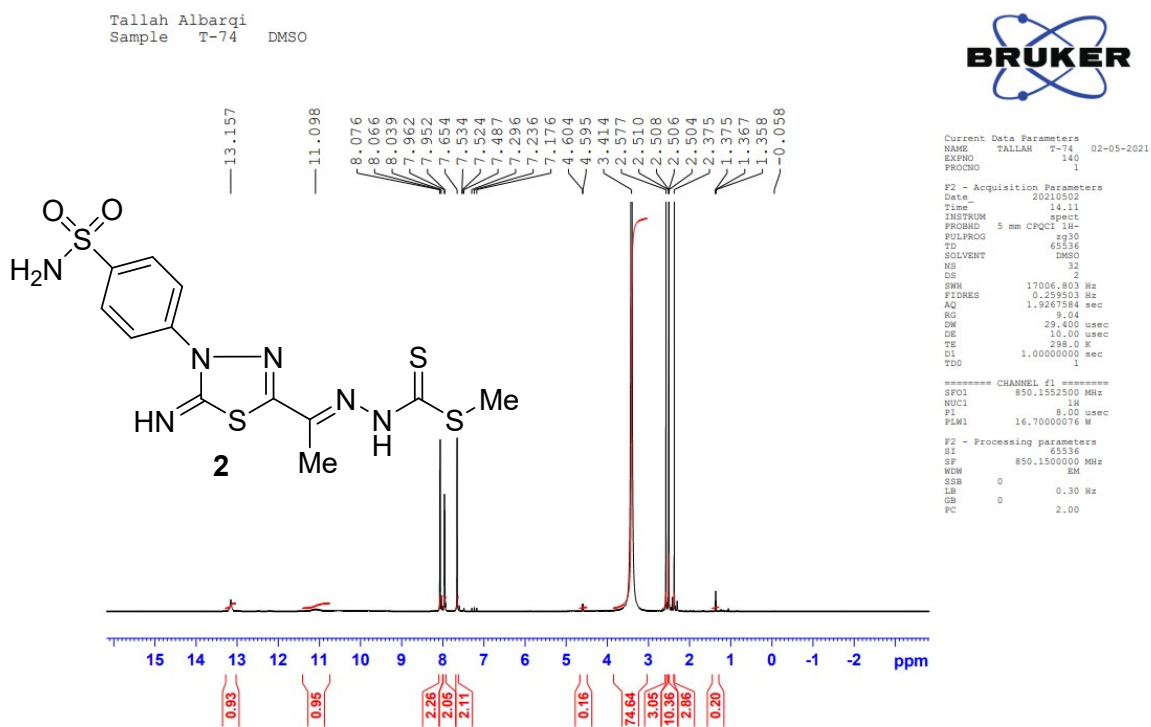

Figure S2. <sup>1</sup>H-NMR spectrum of compound 2.

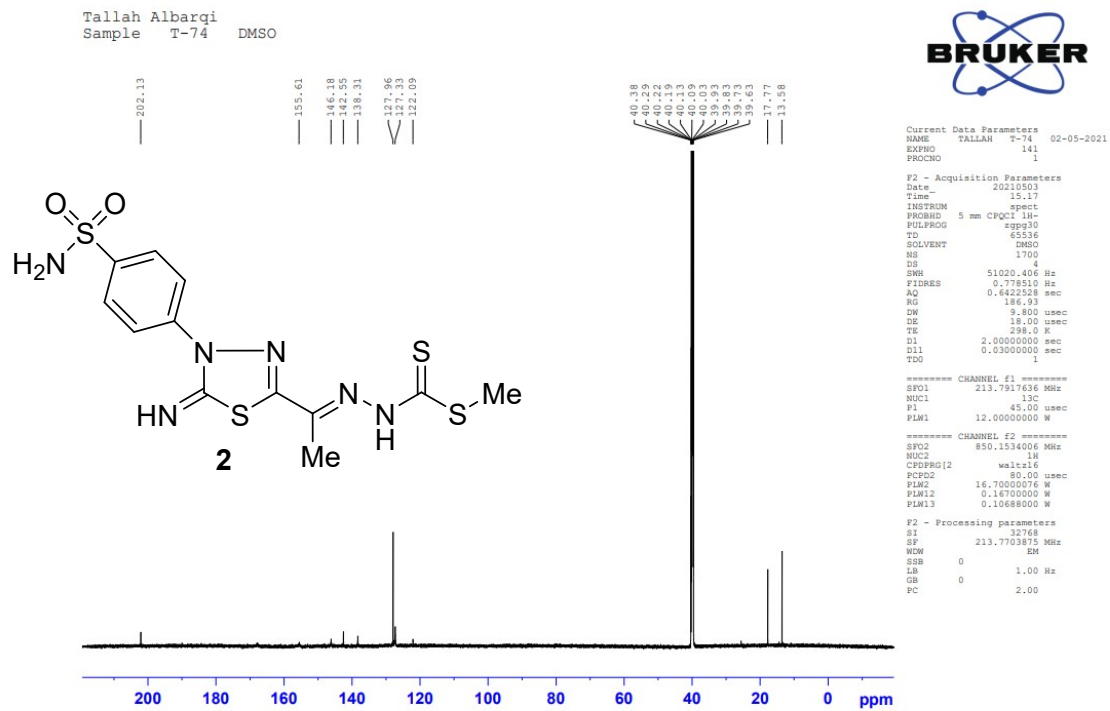

Figure S3. <sup>13</sup>C-NMR spectrum of compound 2.

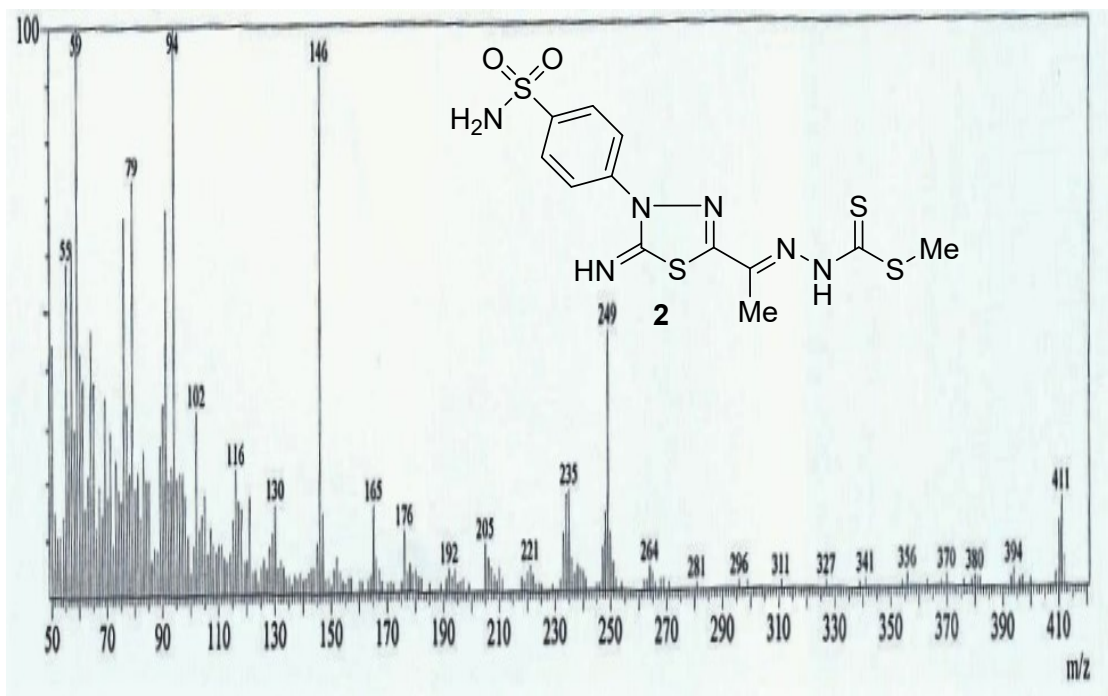

Figure S4. Mass spectrum of compound 2.

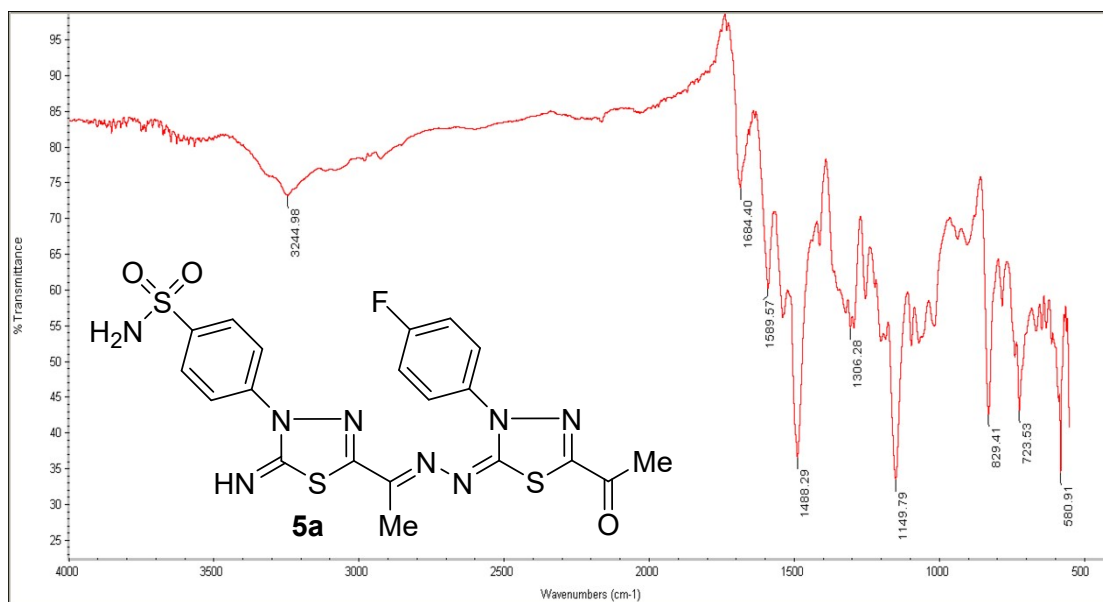

Figure S5. IR spectrum of compound 5a.

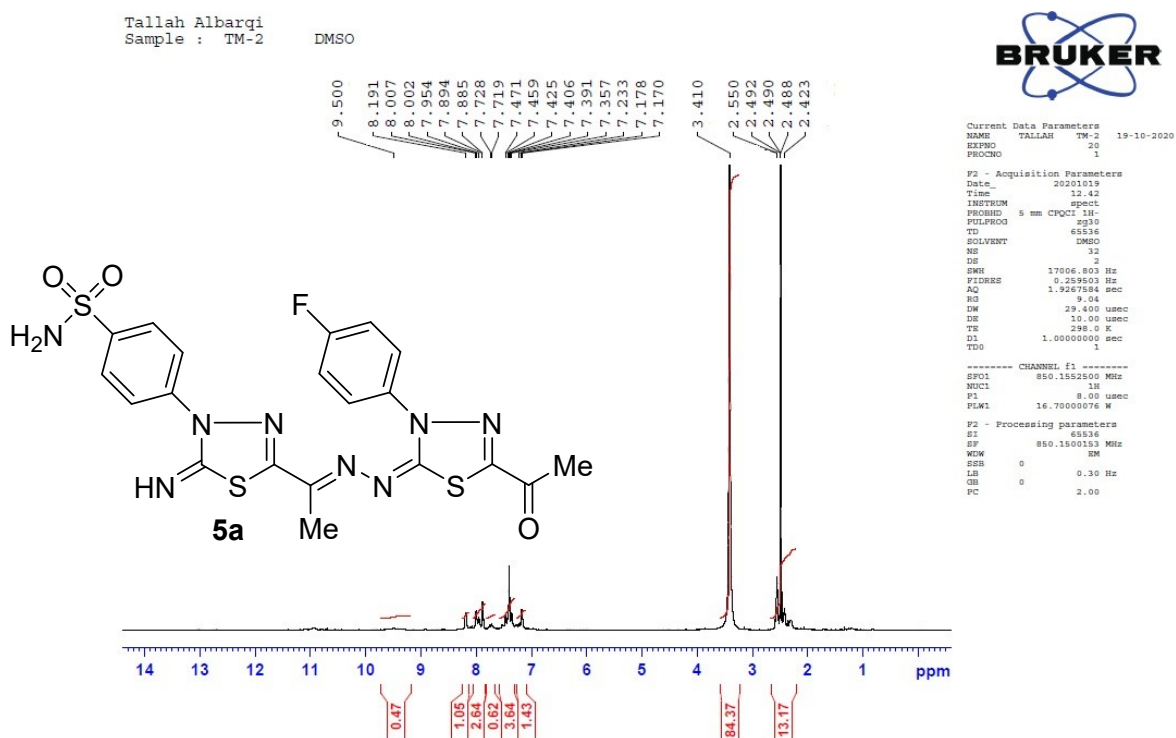

Figure S6. <sup>1</sup>H-NMR spectrum of compound 5a.

Tallah Albarqi  
Sample : TM-2

DMSO

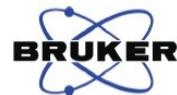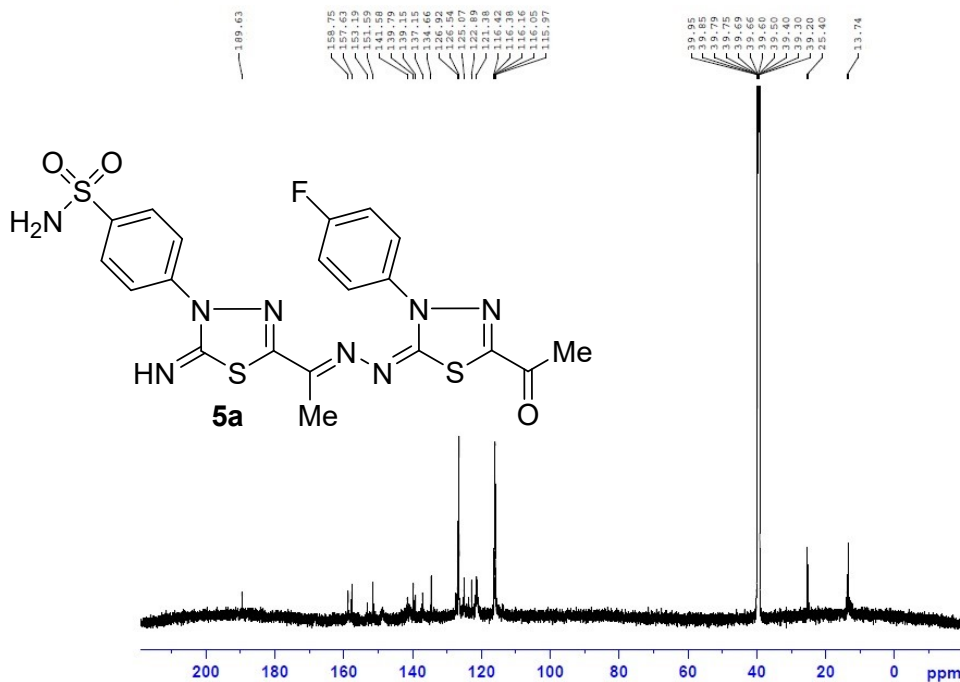

Current Data Parameters  
NAME TALLAH TM-2 19-10-2020  
EXPNO 21  
PROCNO 1

F2 - Acquisition Parameters  
Date\_ 20201019  
Time 13.00  
INSTRUM spect  
PROBHD 5 mm CPQCI 1H  
PULPROG zgpg30  
TD 65536  
SOLVENT DMSO  
NS 2048  
DS 4  
SWH 51020.406 Hz  
FIDRES 0.778510 Hz  
AQ 0.6422528 sec  
RG 186.93  
RW 9.800 usec  
RE 18.00 usec  
TE 298.0 K  
D1 2.0000000 sec  
D11 0.0300000 sec  
TDO 1

----- CHANNEL f1 -----  
SFO1 213.7917636 MHz  
NUC1 13C  
P1 48.00 usec  
PLM1 12.0000000 W

----- CHANNEL f2 -----  
SFO2 850.1534006 MHz  
NUC2 1H  
CPCPRG2 waltz16  
PCPD2 80.00 usec  
PLM2 16.7000076 W  
PLM12 0.16700000 W  
PLM13 0.10688000 W

F2 - Processing parameters  
SI 32768  
SF 213.7704725 MHz  
WDW EM  
SSB 0  
LB 1.50 Hz  
GB 0  
PC 2.00

Figure S7. <sup>13</sup>C-NMR spectrum of compound 5a.

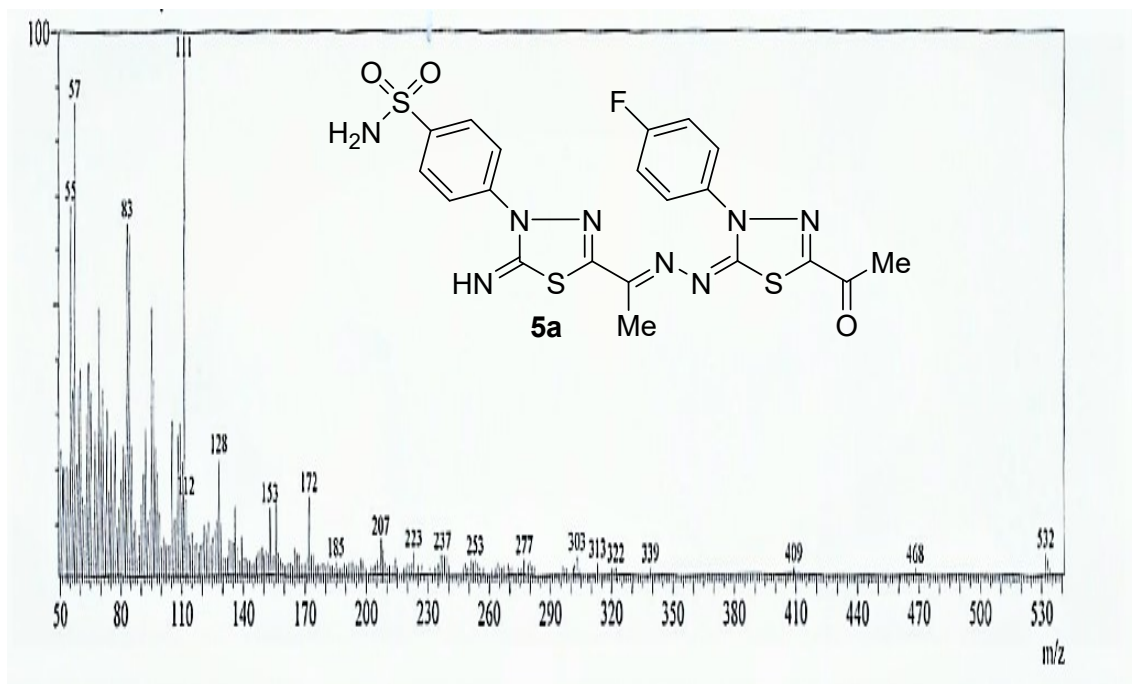

Figure S8. Mass spectrum of compound 5a.

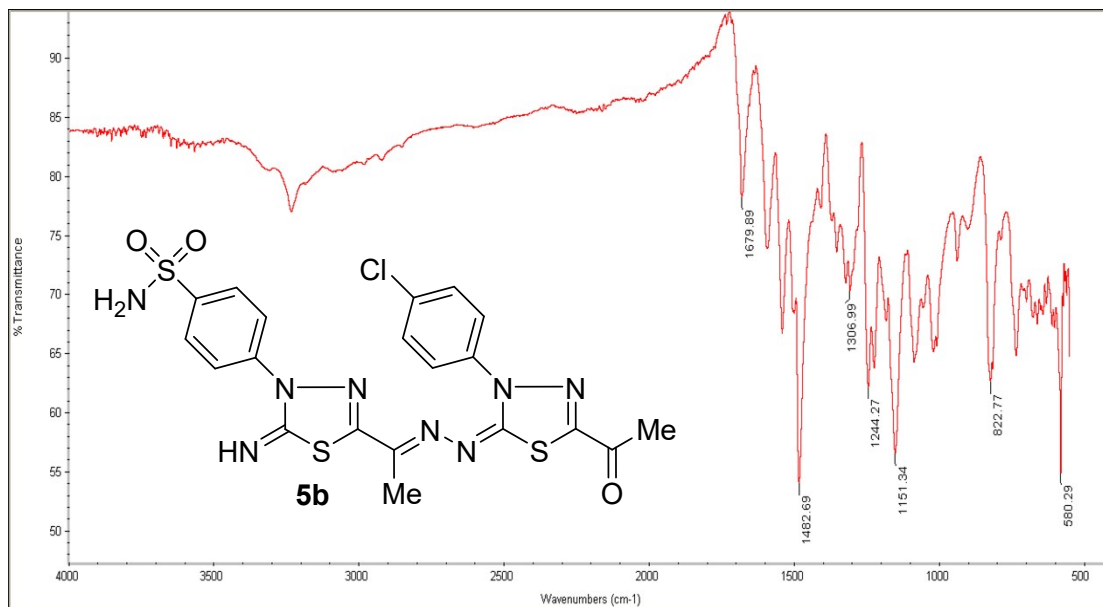

Figure S9. IR spectrum of compound 5b.

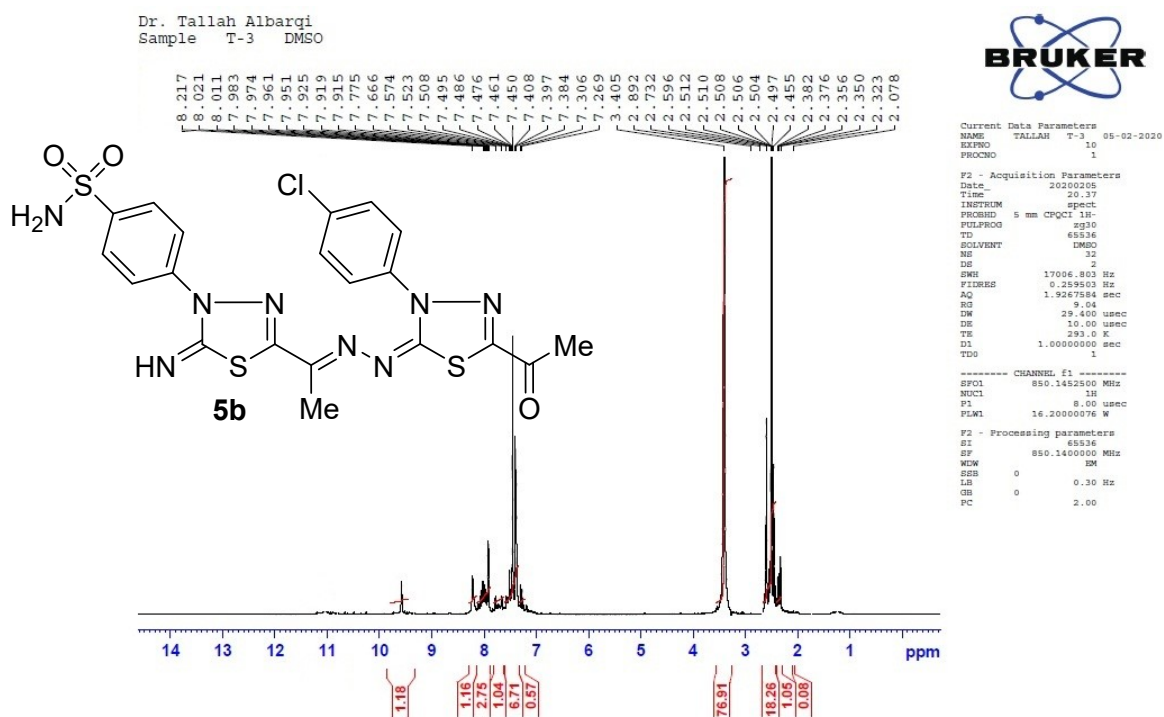

Figure S10. <sup>1</sup>H-NMR spectrum of compound 5b.



Dr. Tallah Albarqi  
Sample T-3 DMSO

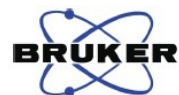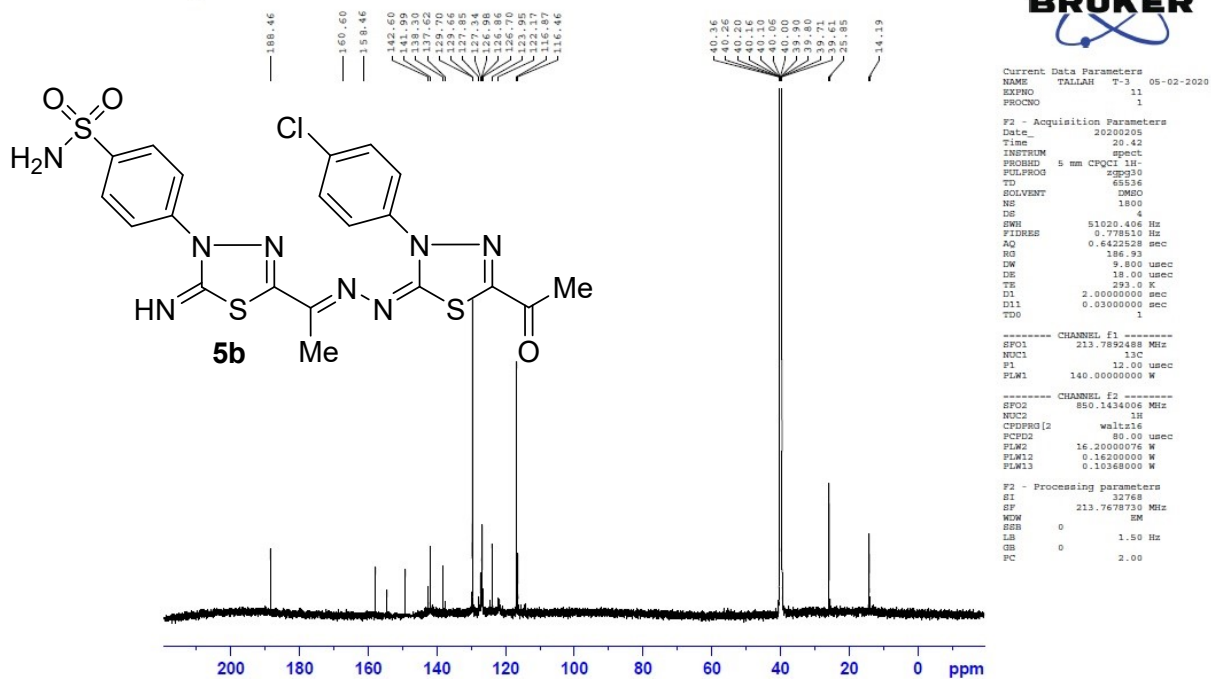

Figure S11. <sup>13</sup>C-NMR spectrum of compound 5b.

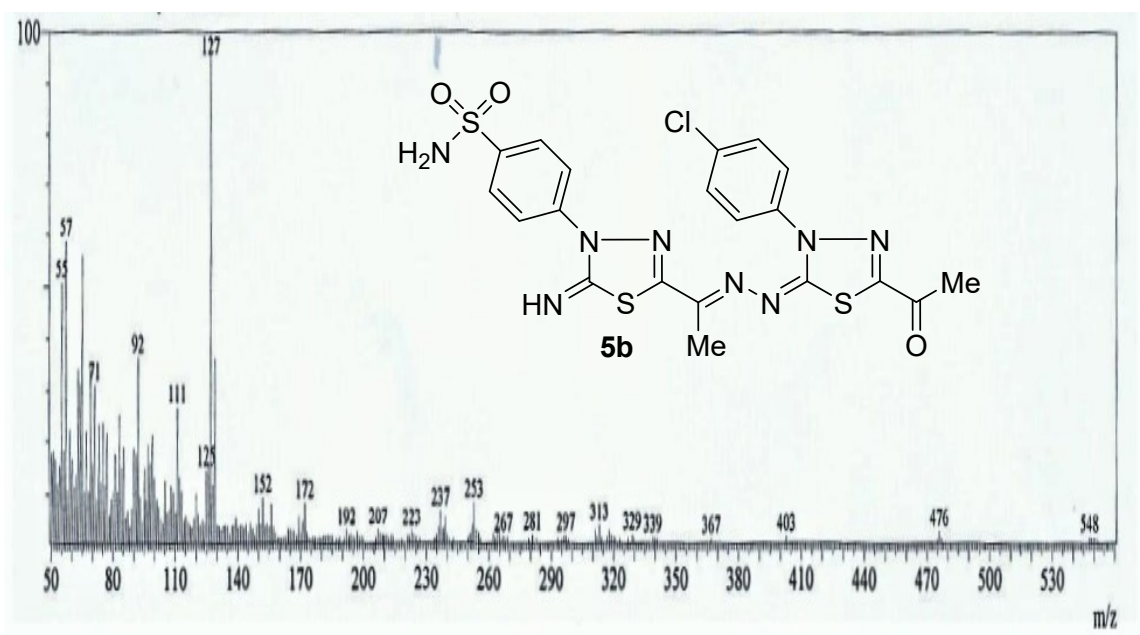

Figure S12. Mass spectrum of compound 5b.

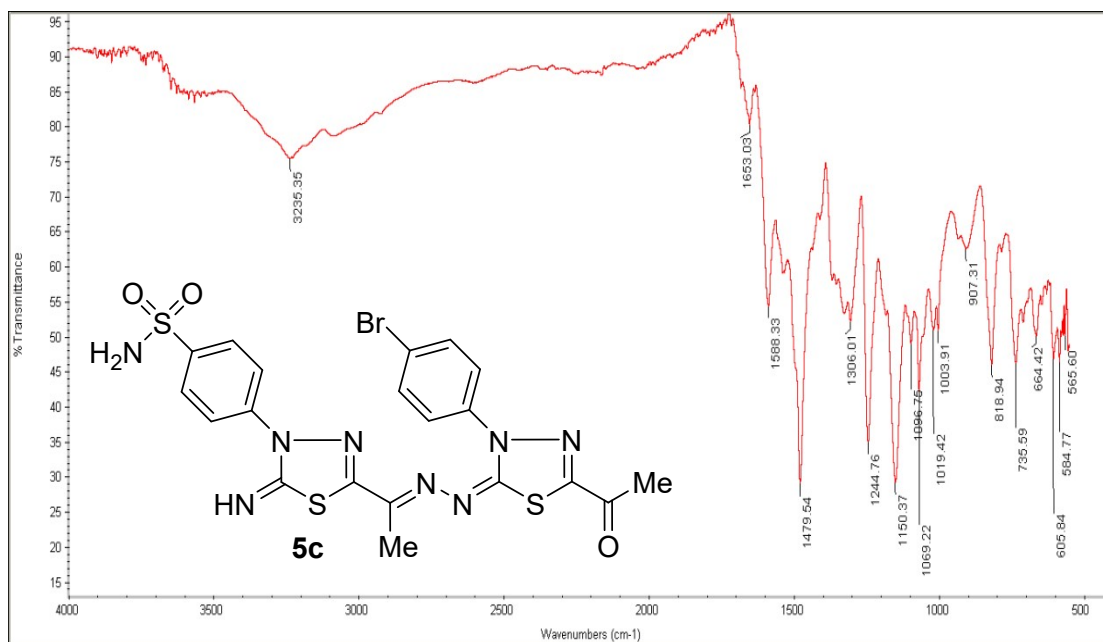

Figure S13. IR spectrum of compound 5c.

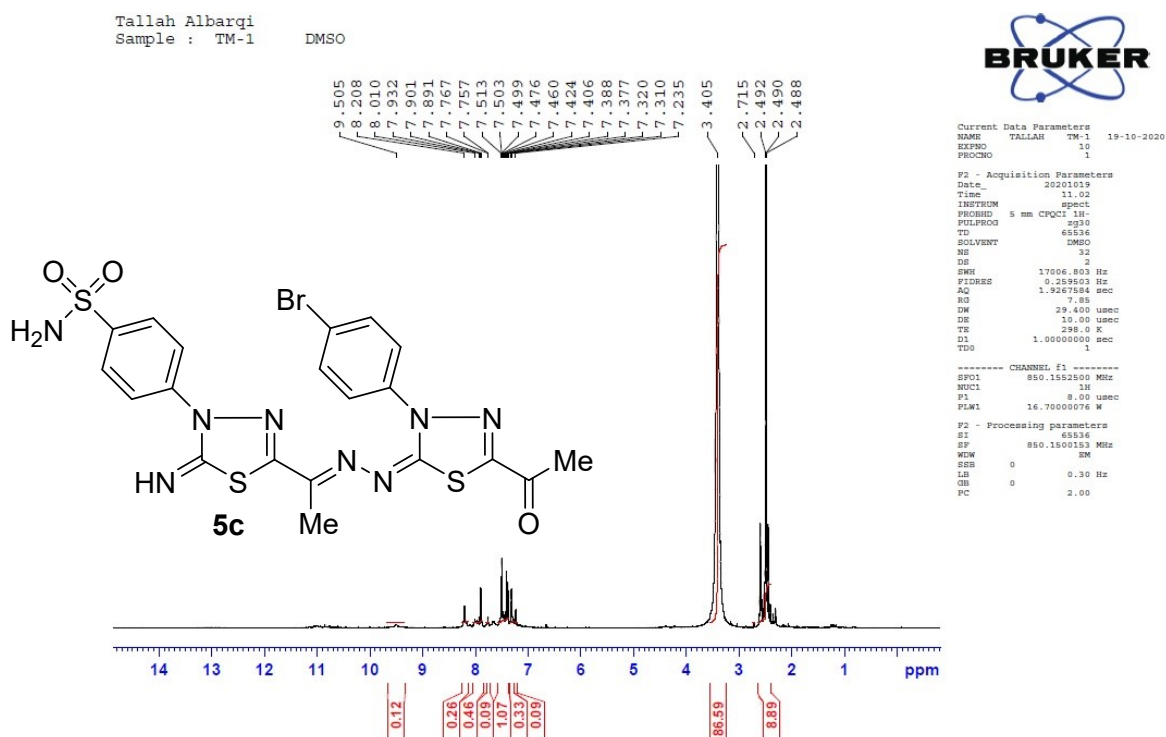

Figure S14. <sup>1</sup>H-NMR spectrum of compound 5c.

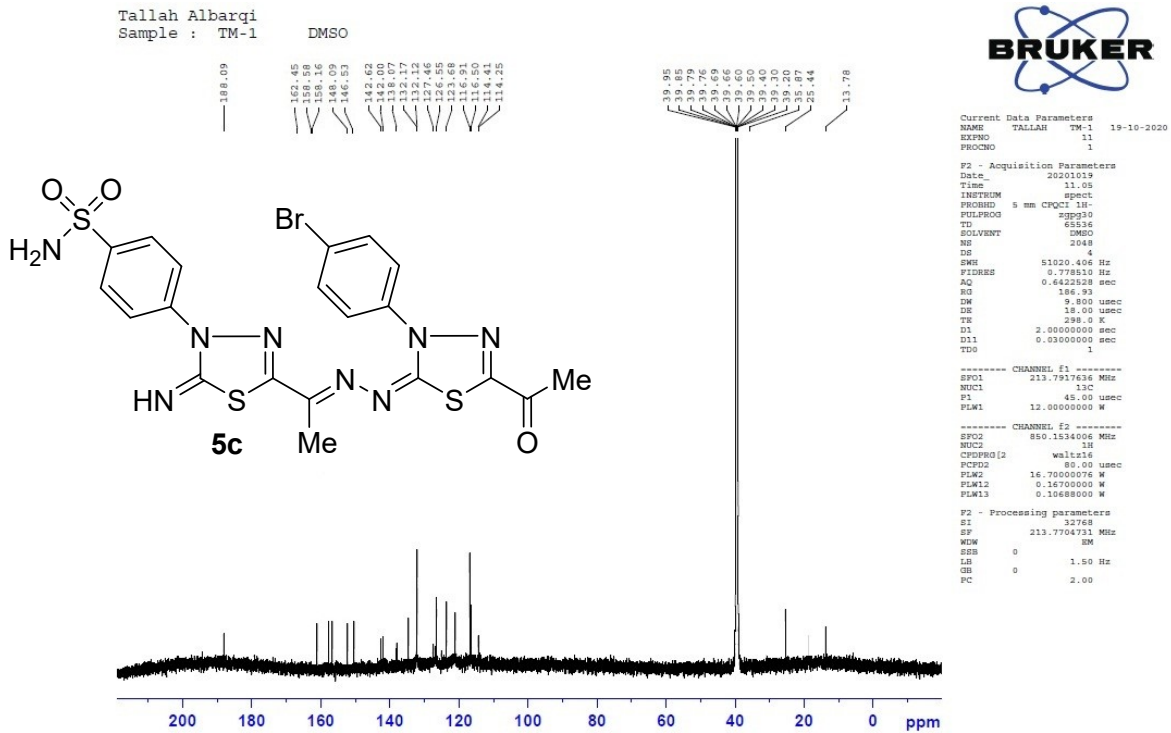

Figure S15. <sup>13</sup>C-NMR spectrum of compound 5c.

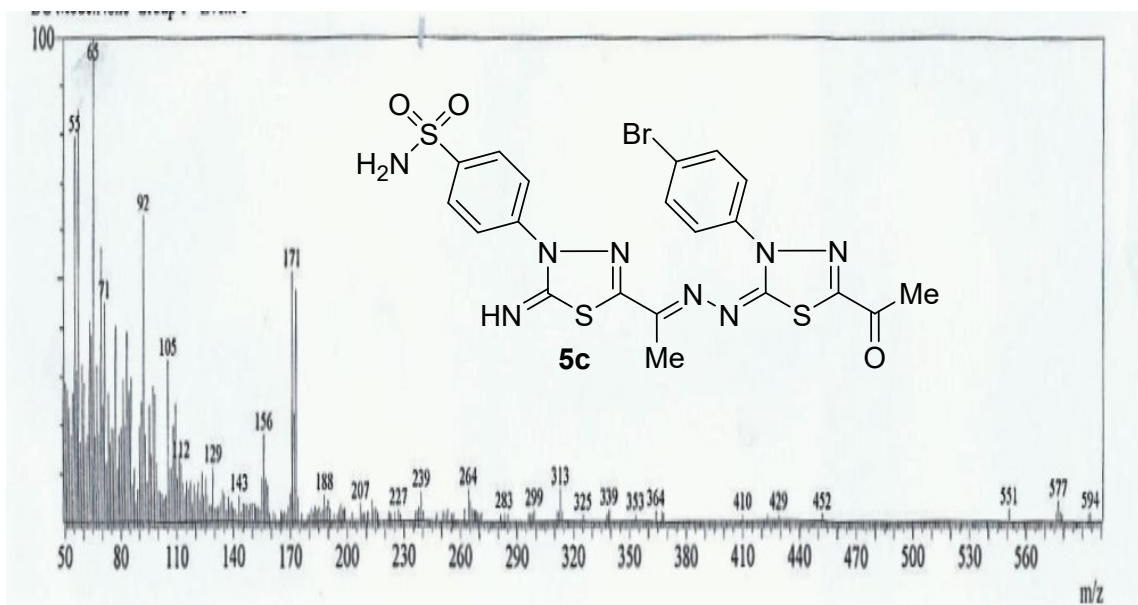

Figure S16. Mass spectrum of compound 5c

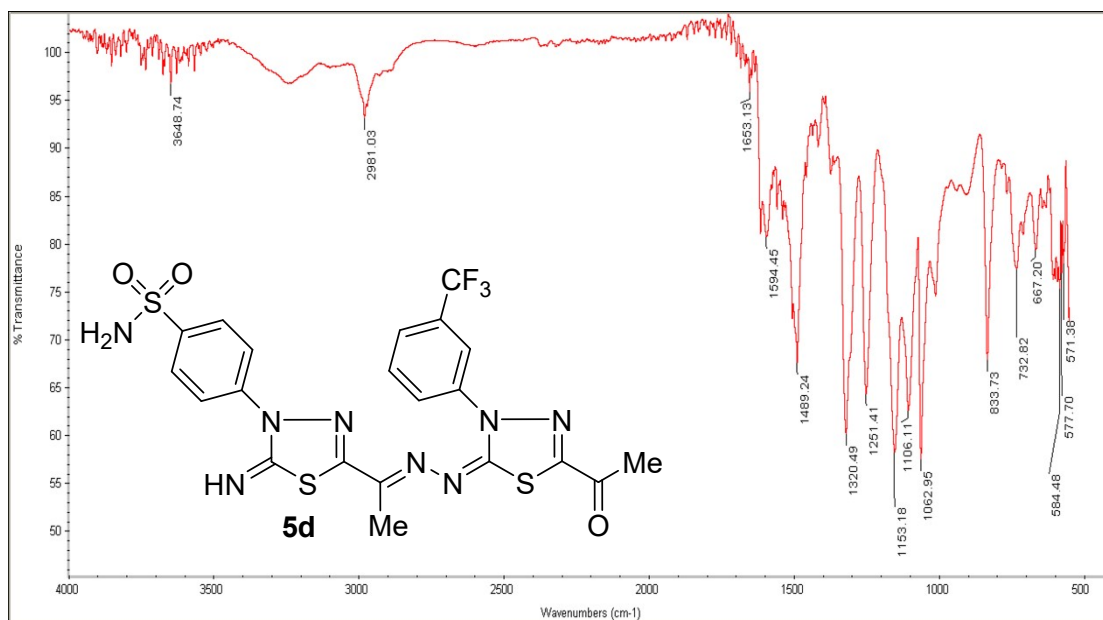

Figure S17. IR spectrum of compound 5d.

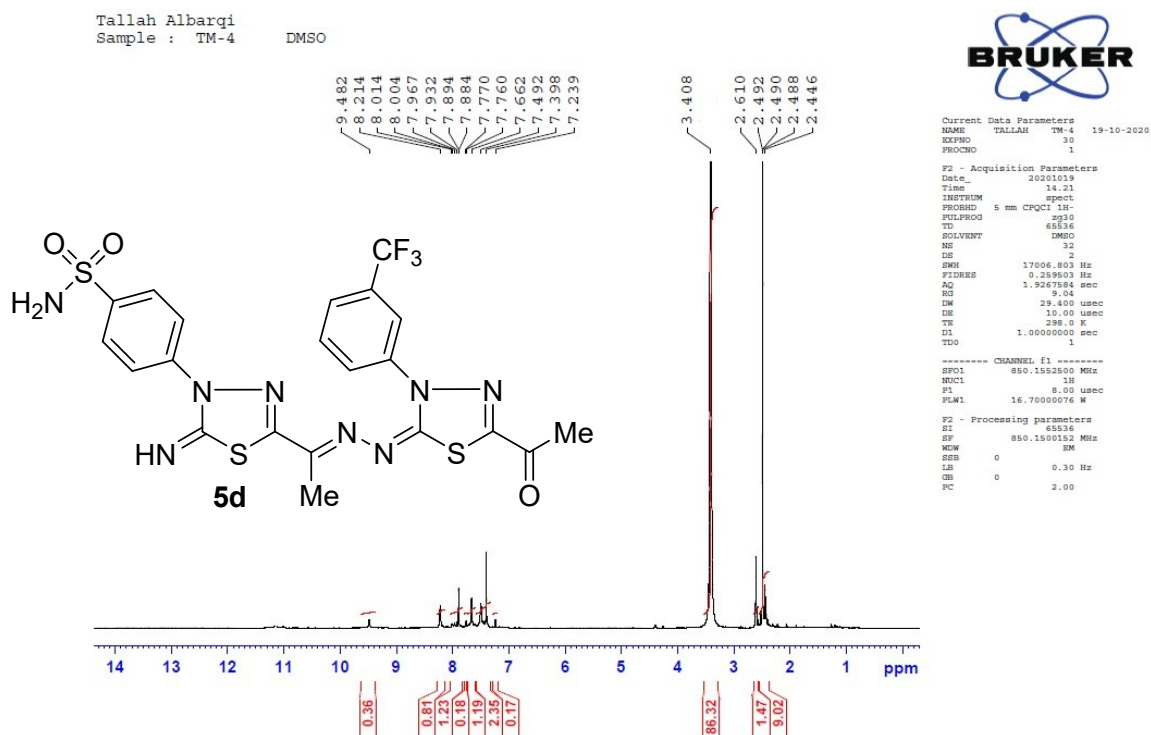

Figure S18. <sup>1</sup>H-NMR spectrum of compound 5d.

Tallah Albarqi  
Sample : TM-4

DMSO

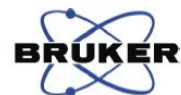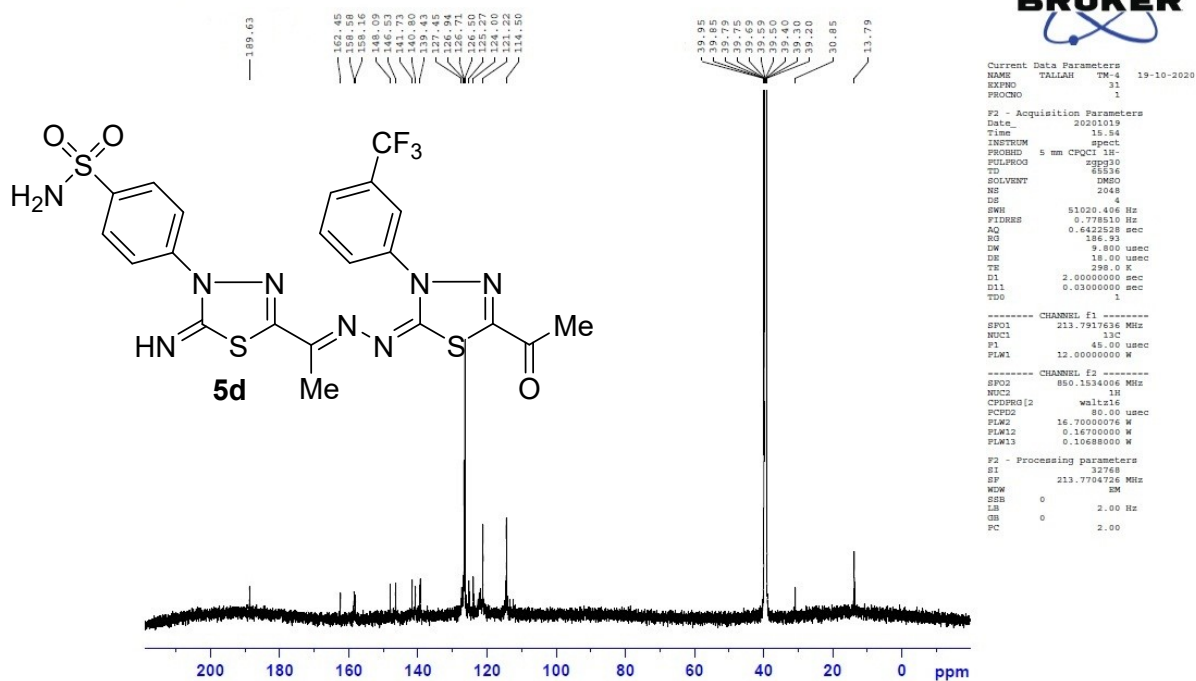

Figure S19. <sup>13</sup>C-NMR spectrum of compound 5d.

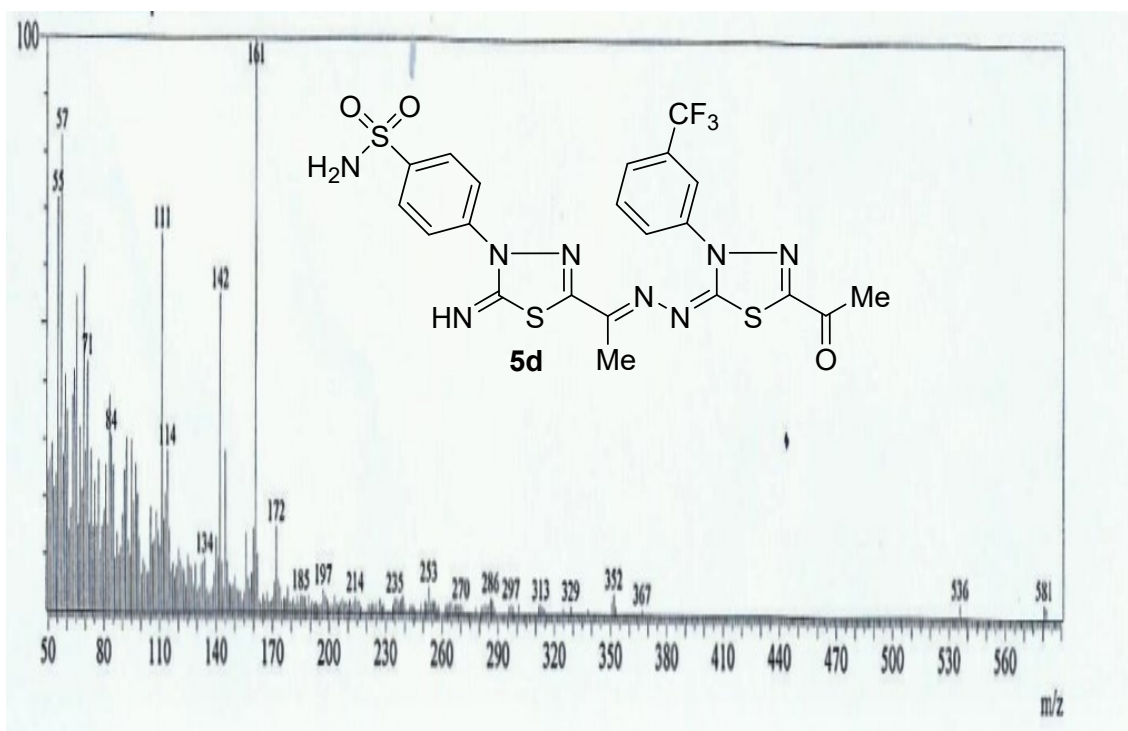

Figure S20. Mass spectrum of compound 5d

Dr. Tallah Albarqi  
Sample T-5 DMSO

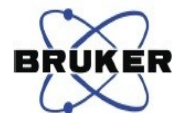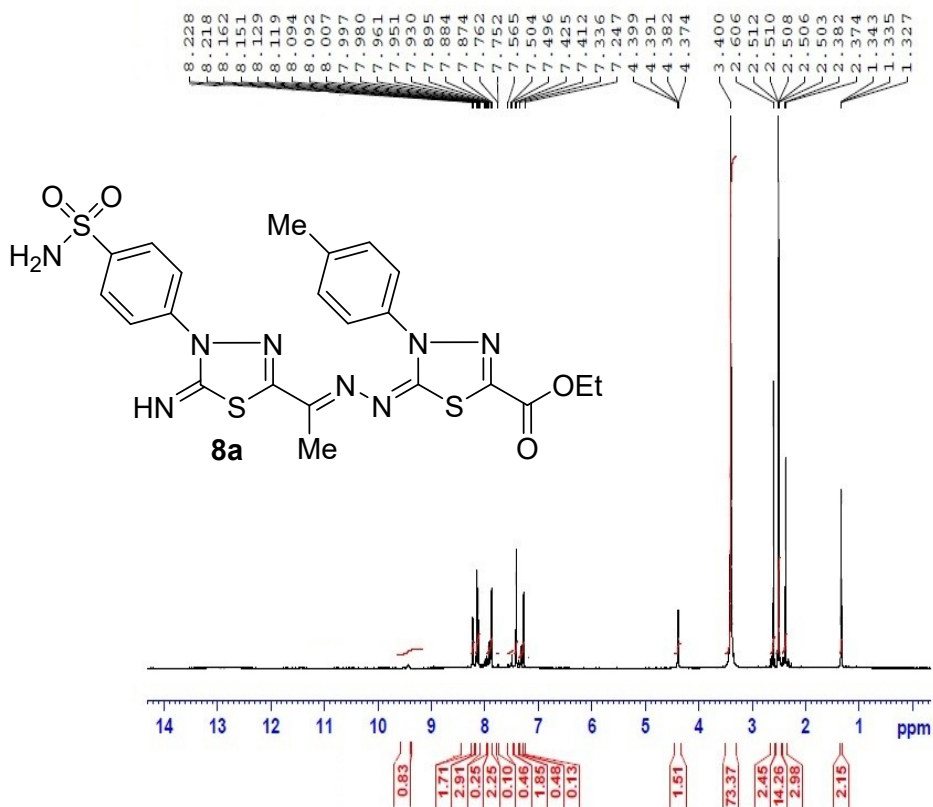

Current Data Parameters  
NAME TALLAH T-5 05-02-2020  
EXPNO 10  
PROCNO 1

F2 - Acquisition Parameters  
Date\_ 20200206  
Time 14.42  
INSTRUM spect  
PROBHD 5 mm CPQCI 1H-  
PULPROG zg30  
TD 65536  
SOLVENT DMSO  
NS 32  
DS 2  
SWH 17006.803 Hz  
FIDRES 0.25303 Hz  
AQ 1.9267584 sec  
RG 10.55  
DW 29.400 usec  
DE 10.00 usec  
TE 293.0 K  
D1 1.00000000 sec  
TDO 1

----- CHANNEL f1 -----  
SFO1 850.1452500 MHz  
NUC1 1H  
P1 8.00 usec  
PLW1 16.20000076 W

F2 - Processing parameters  
SI 65536  
SF 850.1400000 MHz  
WDW EM  
SBB 0  
LB 0.30 Hz  
GB 0  
PC 2.00

Figure S21. <sup>1</sup>H-NMR spectrum of compound 8a.

Dr. Tallah Albarqi  
Sample T-5 DMSO

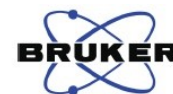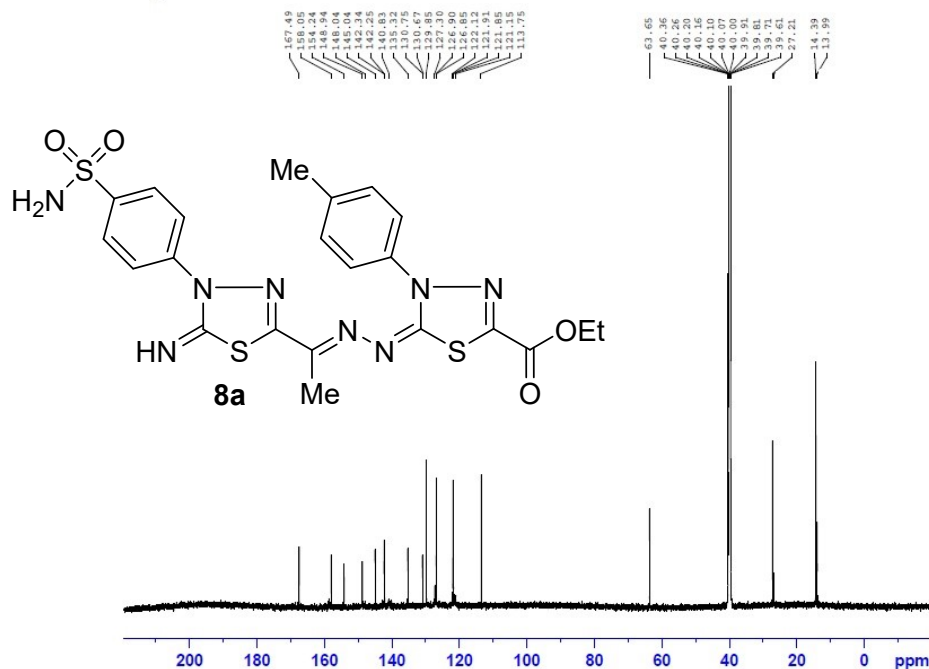

Current Data Parameters  
NAME TALLAH T-5 05-02-2020  
EXPNO 11  
PROCNO 1

F2 - Acquisition Parameters  
Date\_ 20200206  
Time 16.05  
INSTRUM spect  
PROBHD 5 mm CPQCI 1H-  
PULPROG zgpg30  
TD 65536  
SOLVENT DMSO  
NS 1800  
DS 4  
SWH 51020.406 Hz  
FIDRES 0.778510 Hz  
AQ 0.6423508 sec  
RG 186.93  
DW 9.800 usec  
DE 18.00 usec  
TE 293.0 K  
D1 2.00000000 sec  
D11 0.03000000 sec  
TDO 1

----- CHANNEL f1 -----  
SFO1 213.7892488 MHz  
NUC1 13C  
P1 12.00 usec  
PLW1 140.0000000 W

----- CHANNEL f2 -----  
SFO2 850.1434006 MHz  
NUC2 1H  
CPDPRG2 waltz16  
PCPD2 80.00 usec  
PLW2 16.20000076 W  
PLW12 0.16200000 W  
PLW13 0.10368000 W

F2 - Processing parameters  
SI 32768  
SF 213.7678710 MHz  
WDW EM  
SBB 0  
LB 1.50 Hz  
GB 0  
PC 2.00

Figure S22. <sup>13</sup>C-NMR spectrum of compound 8a.



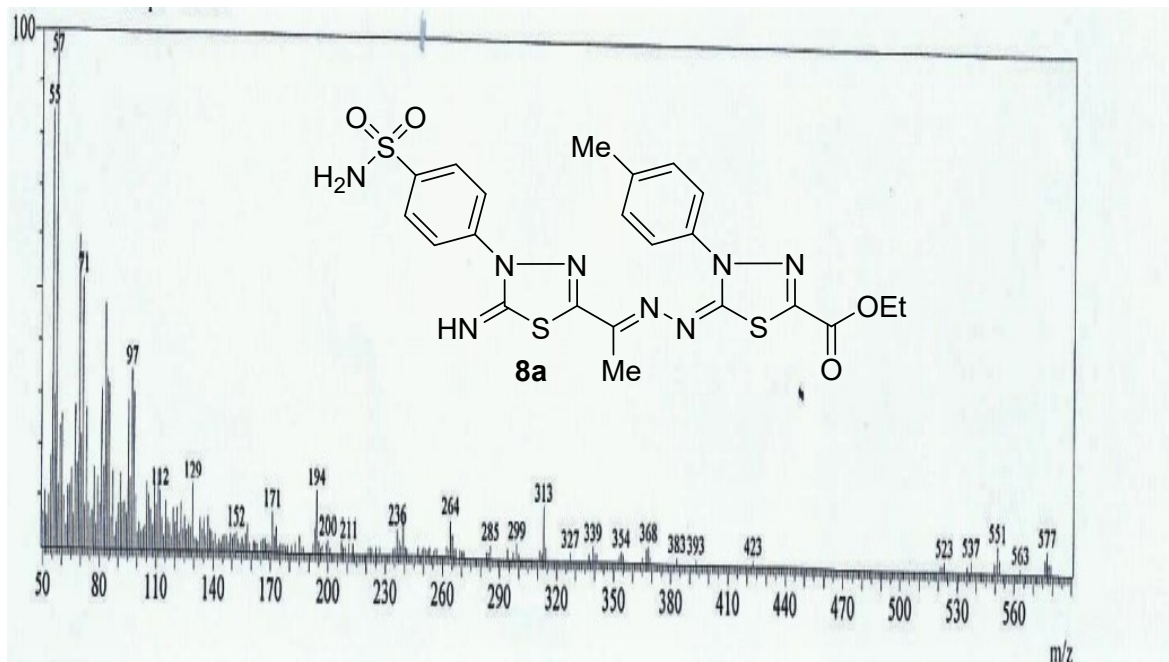

Figure S23. Mass spectrum of compound **8a**.

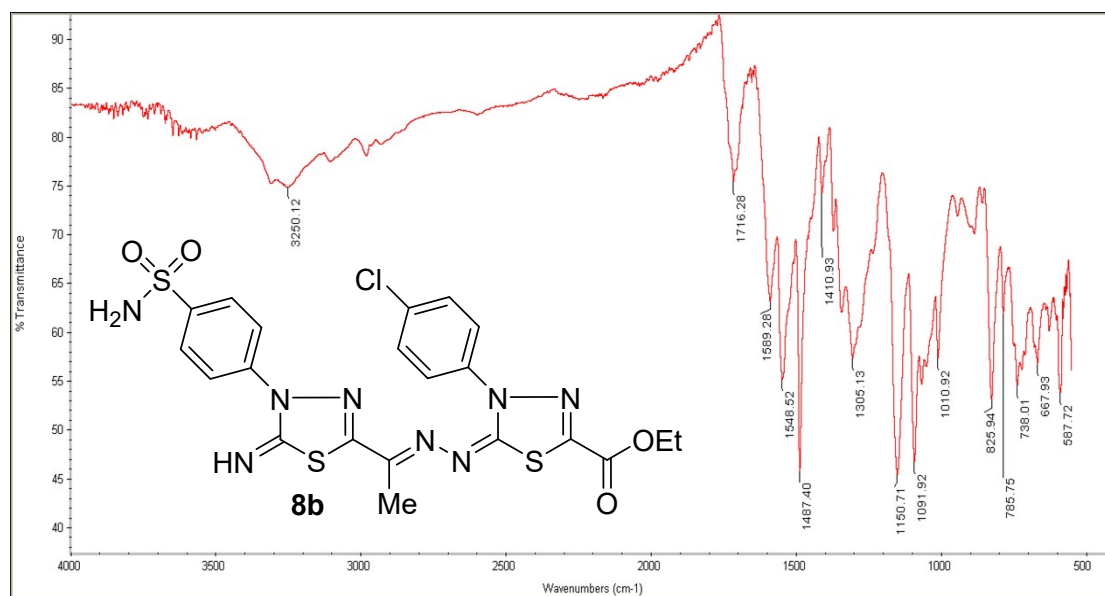

Figure S24. IR spectrum of compound **8b**.

Tallah Albarqi  
Sample : TM-9 DMSO

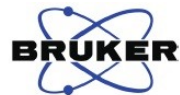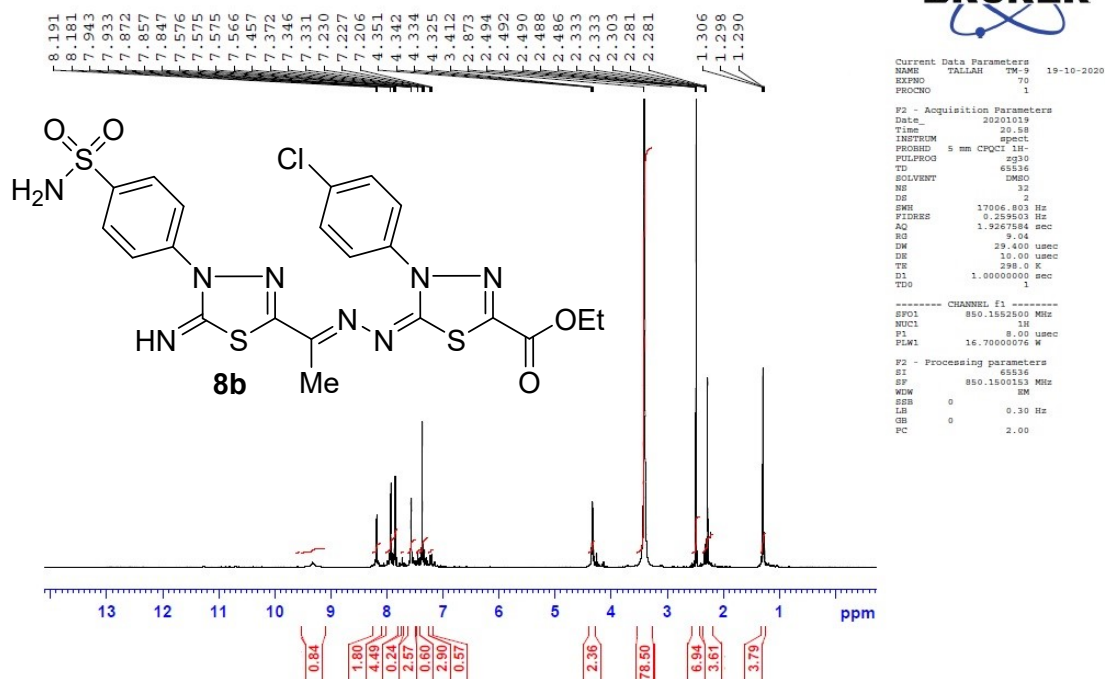

Figure S25. <sup>1</sup>H-NMR spectrum of compound 8b.

Tallah Albarqi  
Sample : TM-9 DMSO

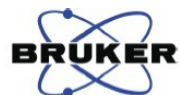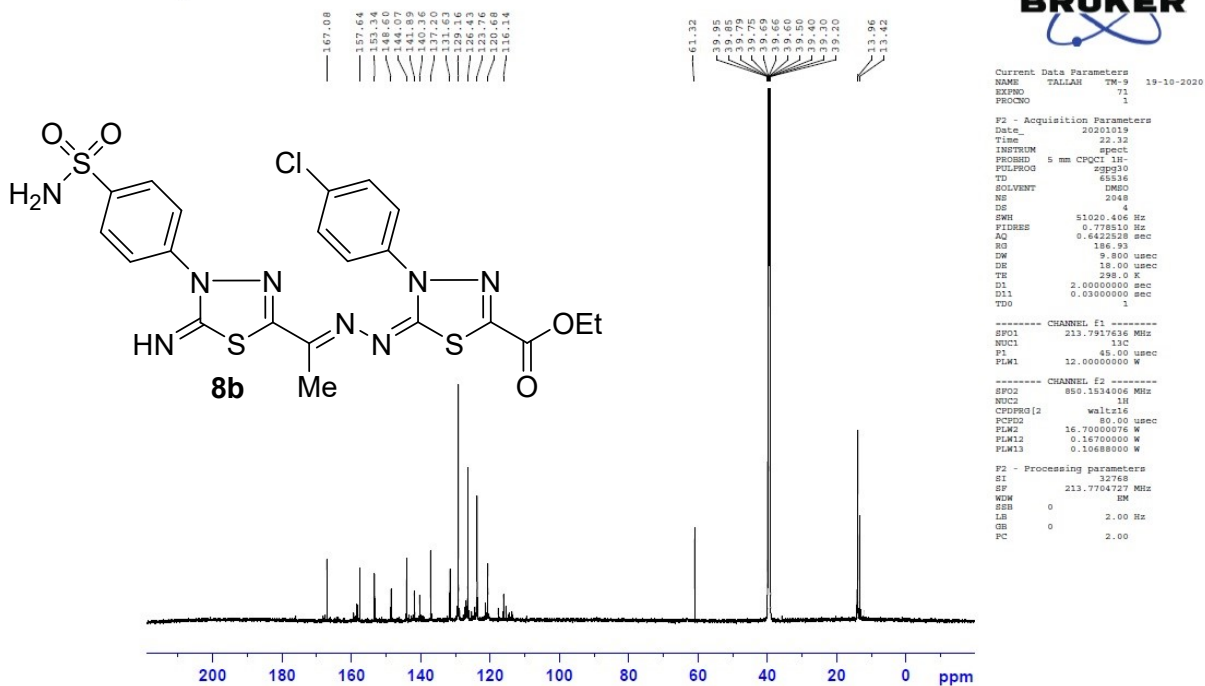

Figure S26. <sup>13</sup>C-NMR spectrum of compound 8b.



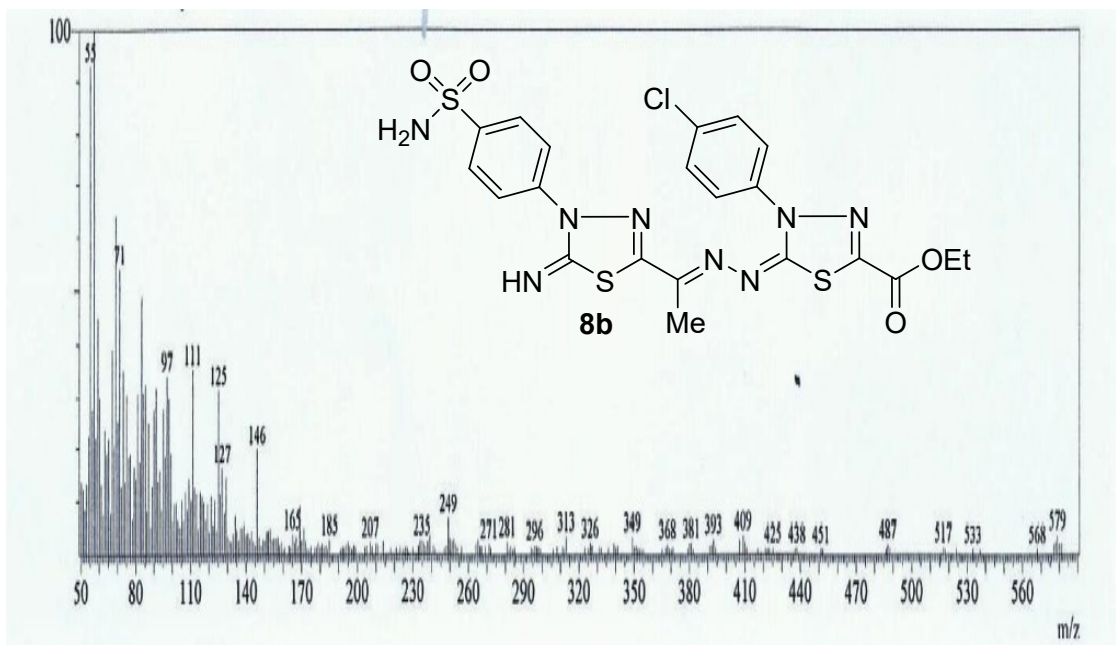

Figure S27. Mass spectrum of compound **8b**.

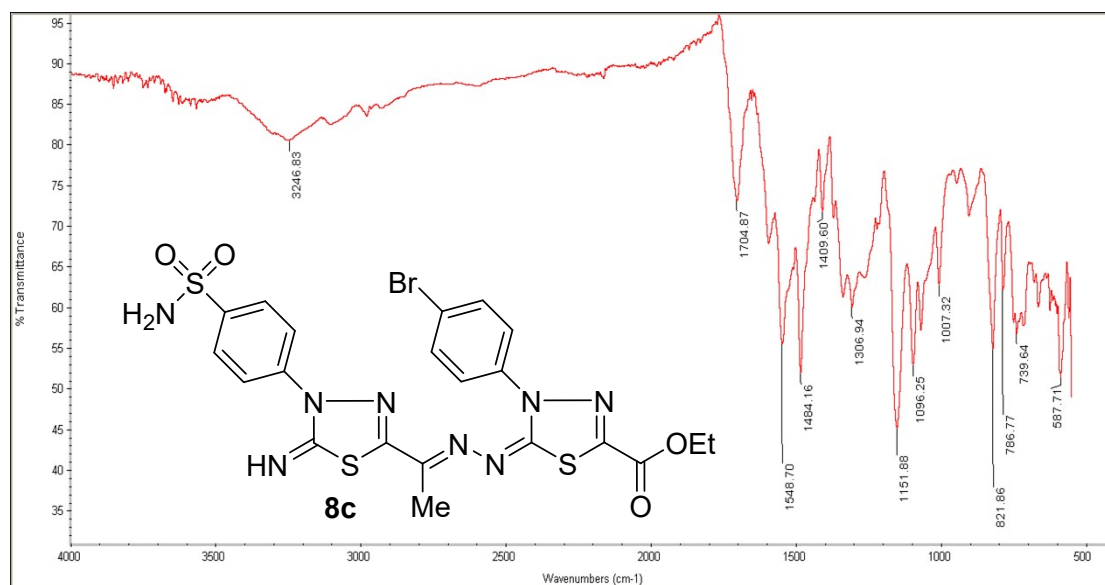

Figure S28. IR spectrum of compound **8c**.

Tallah Albarqi  
Sample : TM-8

DMSO

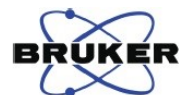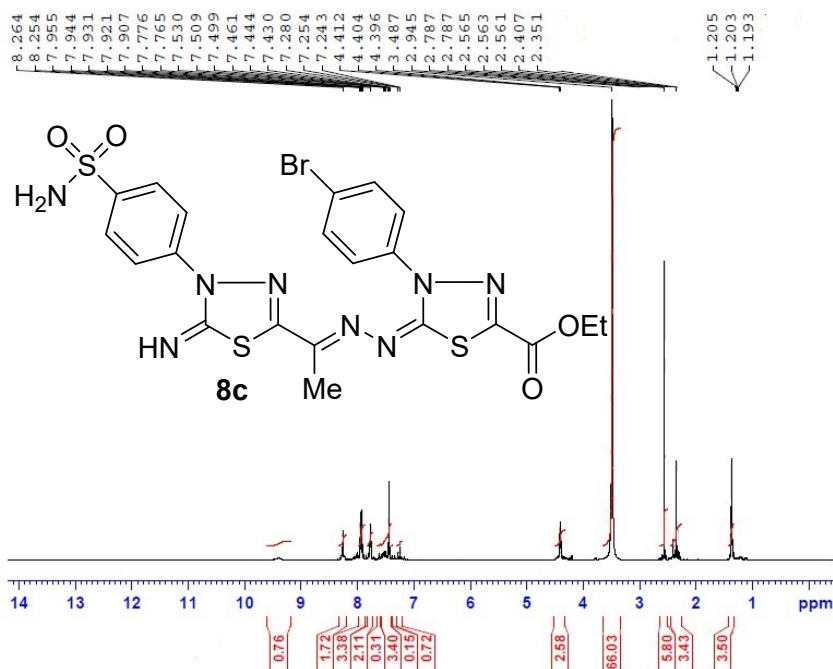

Figure S29. <sup>1</sup>H-NMR spectrum of compound 8c.

Tallah Albarqi  
Sample : TM-8

DMSO

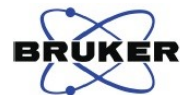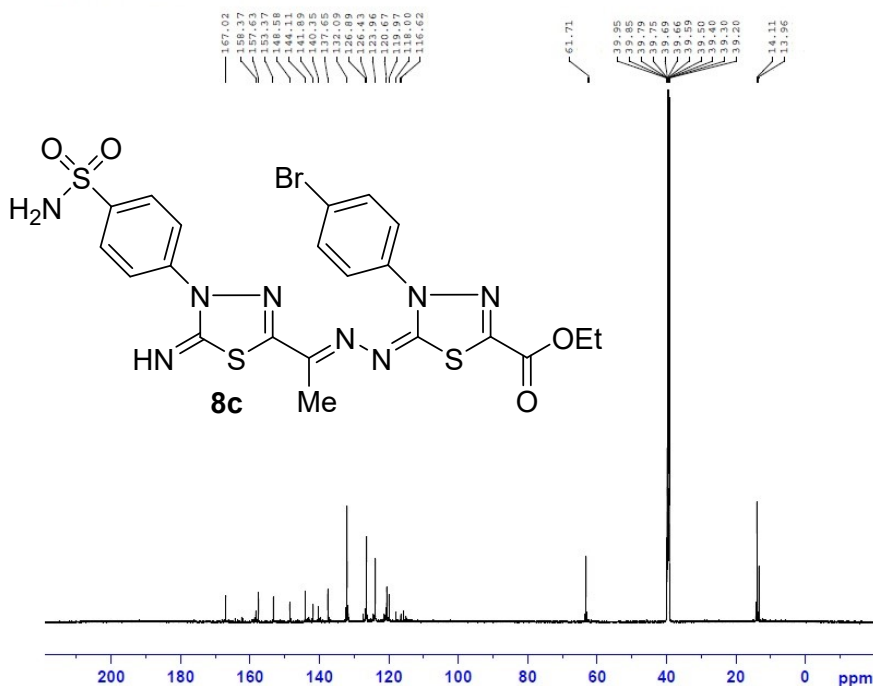

Figure S30. <sup>13</sup>C-NMR spectrum of compound 8c.

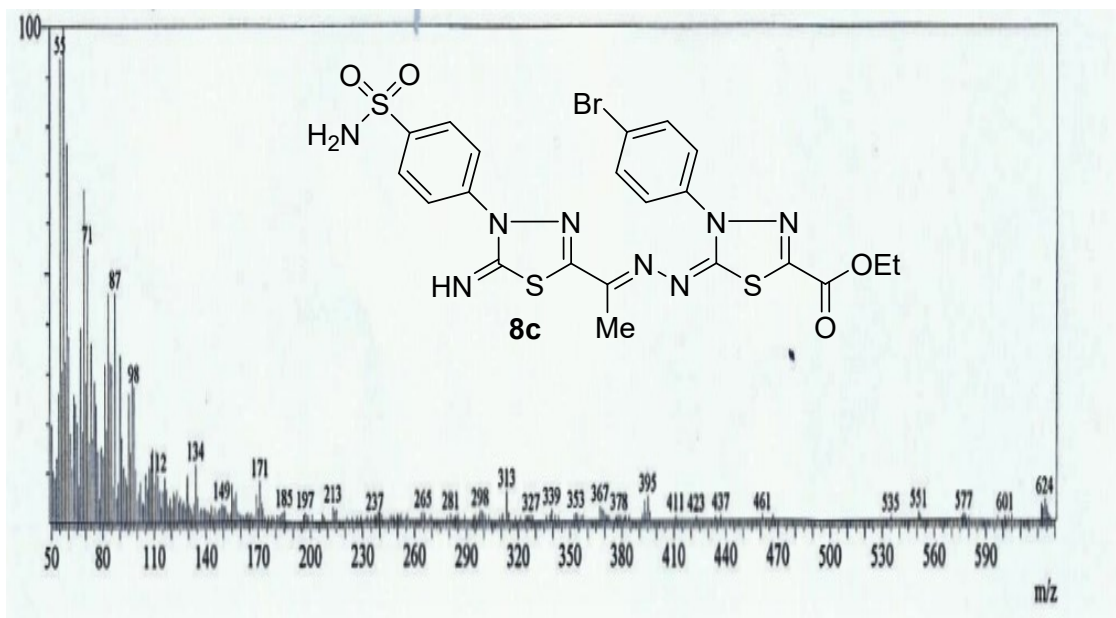

Figure S31. Mass spectrum of compound **8c**.

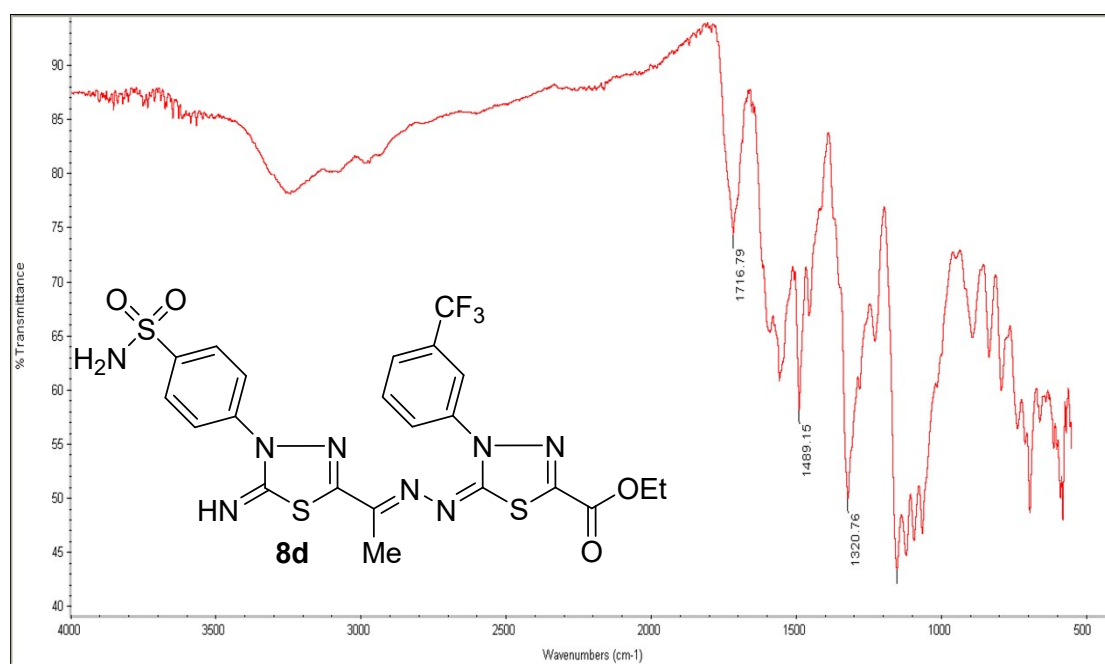

Figure S32. IR spectrum of compound **8d**.

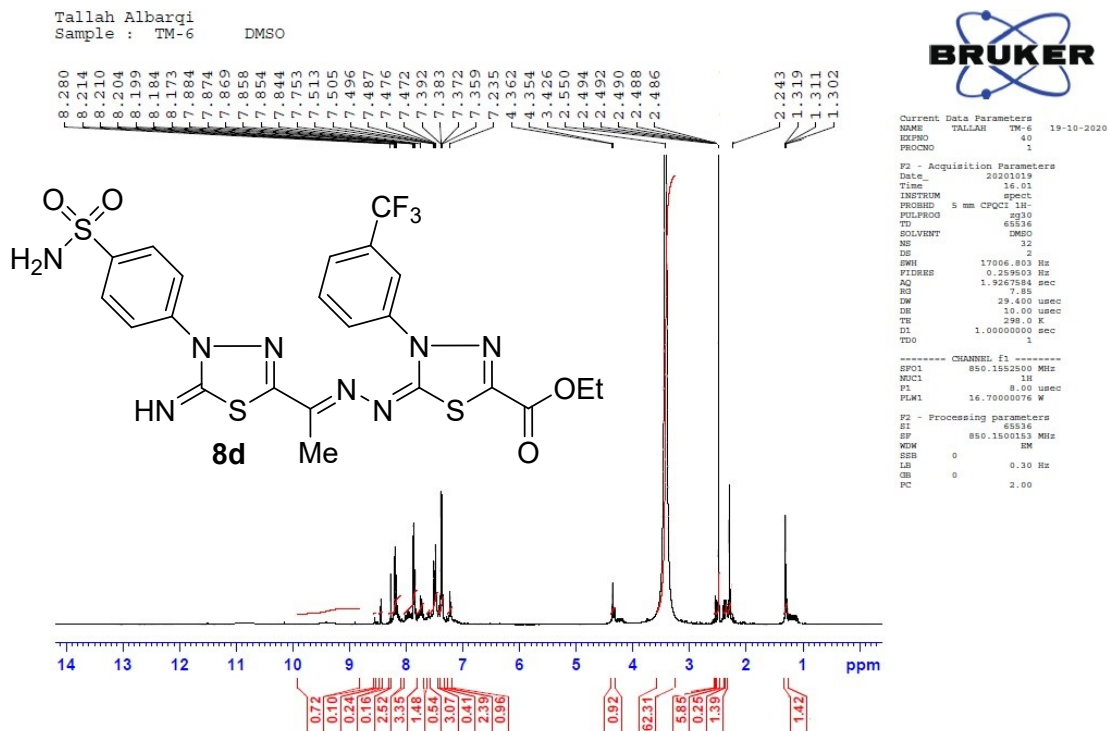

Figure S33. <sup>1</sup>H-NMR spectrum of compound 8d.

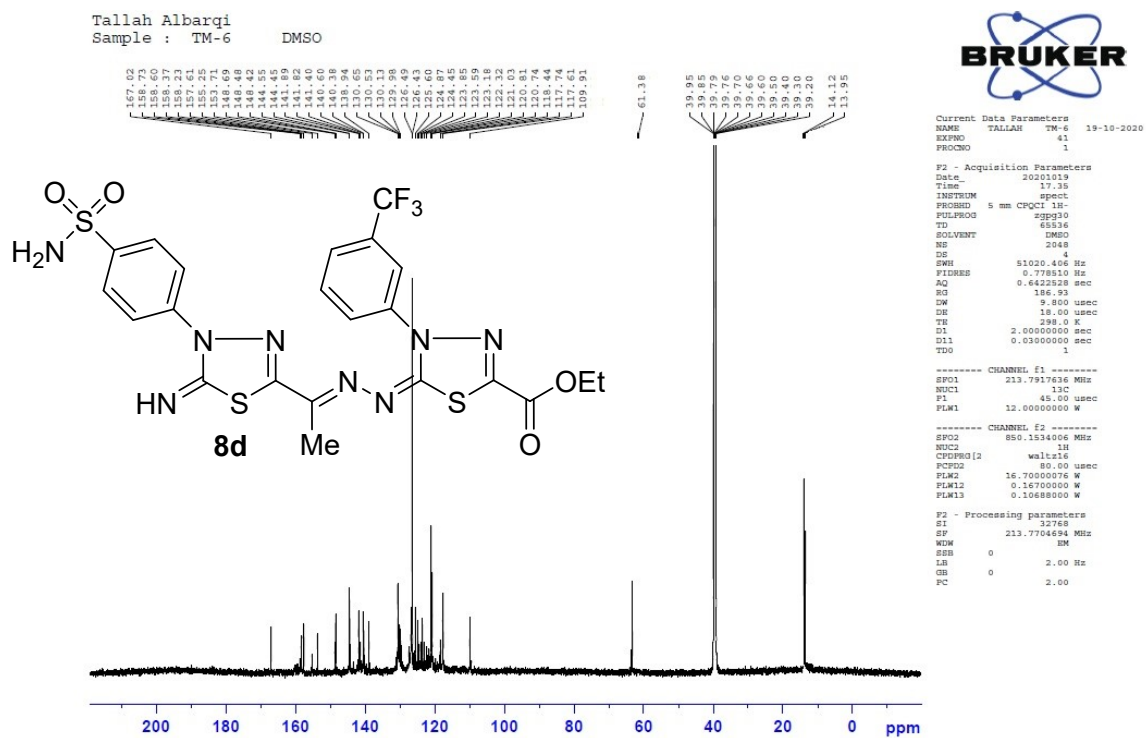

Figure S34. <sup>13</sup>C-NMR spectrum of compound 8d.

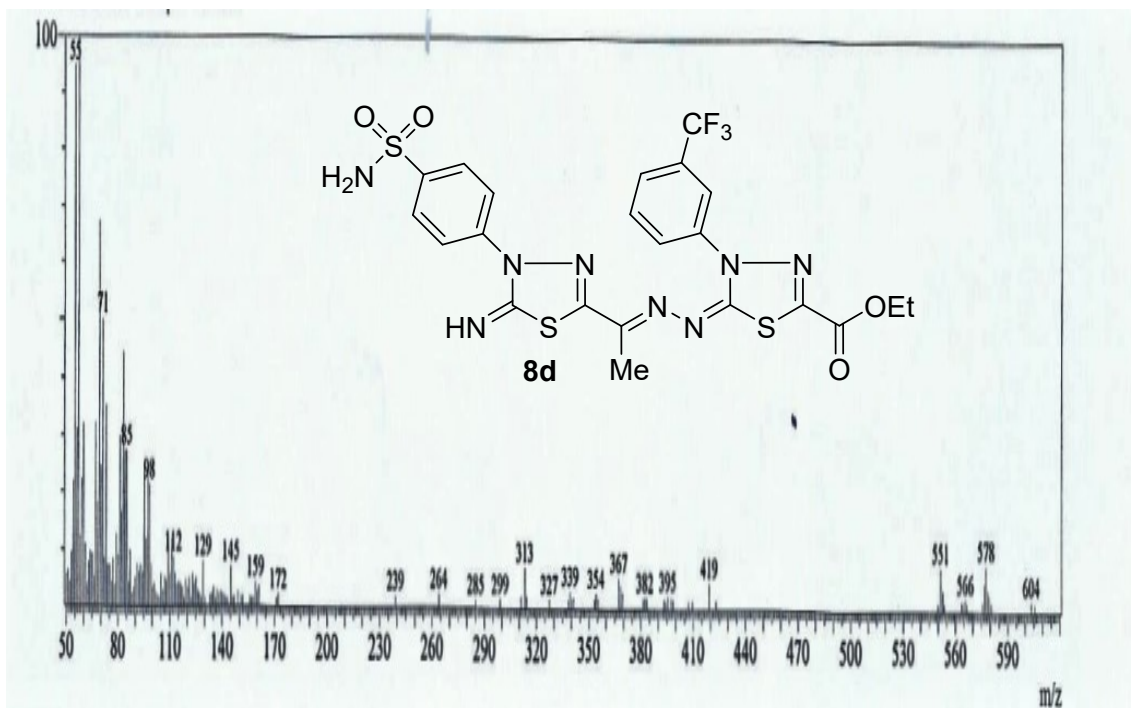

Figure S35. Mass spectrum of compound **8d**.

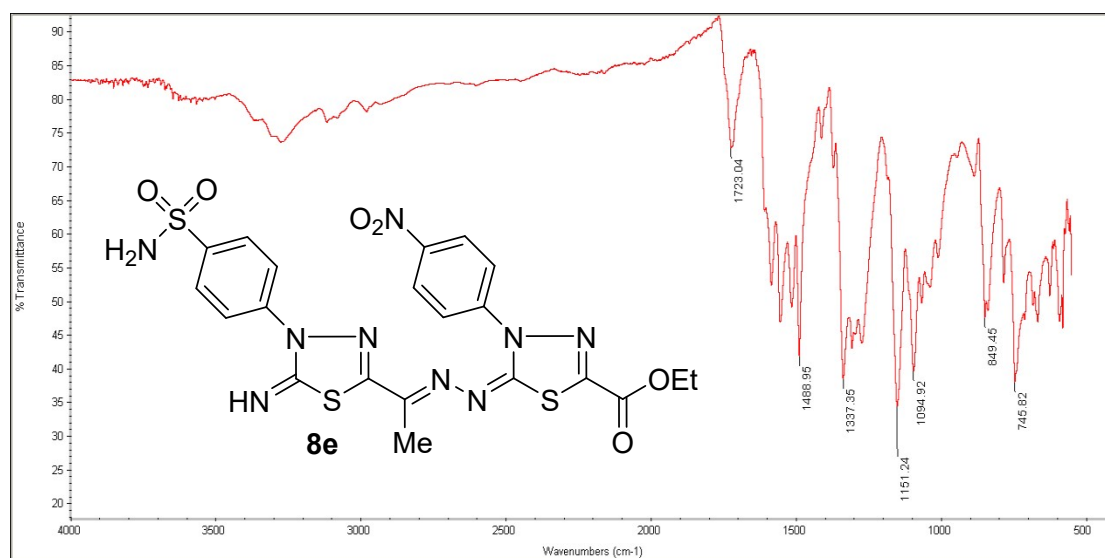

Figure S36. IR spectrum of compound **8e**.

Tallah Albarqi  
Sample : TM-7 DMSO

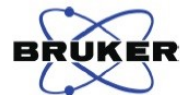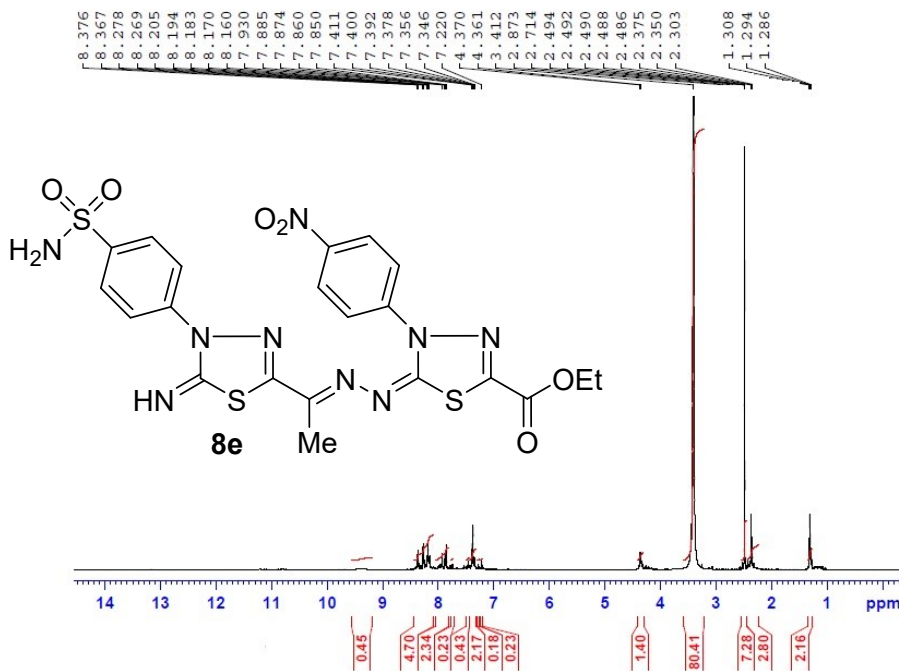

Current Data Parameters  
NAME TALLAH TM-7 19-10-2020  
EXPNO 50  
PROCNO 1

F2 - Acquisition Parameters  
Date\_ 20201019  
Time 17.41  
INSTRUM spect  
PROBHD 5 mm CPQCI 1H-  
PULPROG zg30  
TD 65536  
SOLVENT DMSO  
NS 32  
DS 2  
SWH 17066.803 Hz  
FIDRES 0.288903 Hz  
AQ 1.9267584 sec  
RG 2.04  
DW 29.400 usec  
DE 10.00 usec  
TE 298.0 K  
D1 1.0000000 sec  
TD0 1

----- CHANNEL f1 -----  
SFO1 400.152400 MHz  
NUC1 1H  
P1 8.00 usec  
PLW1 16.70000076 W

F2 - Processing parameters  
SI 65536  
SF 400.150015 MHz  
WDW EM  
SFB 0  
LB 0.30 Hz  
GB 0  
PC 2.00

Figure S37. <sup>1</sup>H-NMR spectrum of compound 8e.

Tallah Albarqi  
Sample : TM-7 DMSO

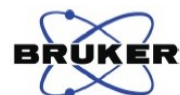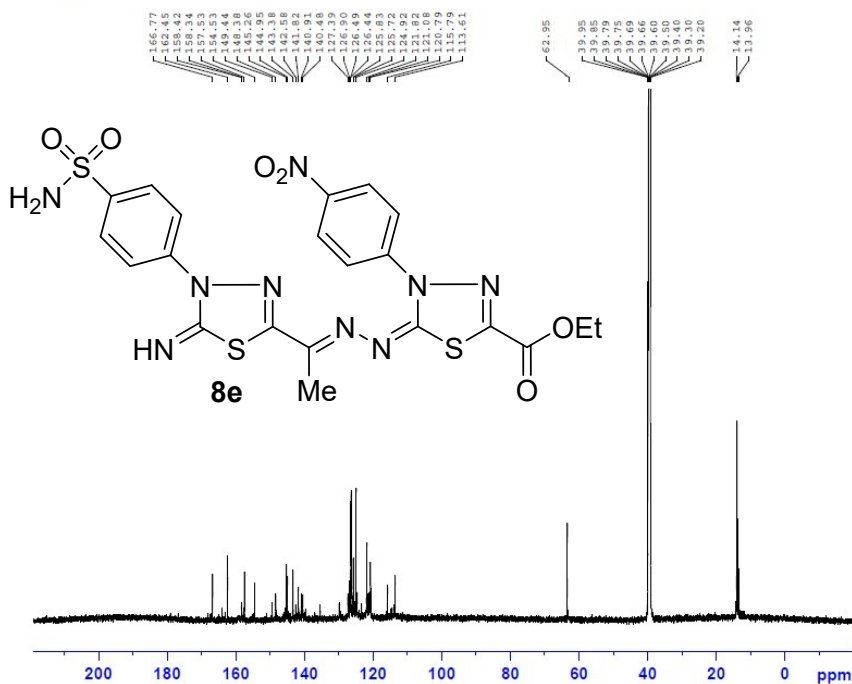

Current Data Parameters  
NAME TALLAH TM-7 19-10-2020  
EXPNO 51  
PROCNO 1

F2 - Acquisition Parameters  
Date\_ 20201019  
Time 19.14  
INSTRUM spect  
PROBHD 5 mm CPQCI 1H-  
PULPROG zgpg30  
TD 65536  
SOLVENT DMSO  
NS 2048  
DS 4  
SWH 51020.406 Hz  
FIDRES 0.778810 Hz  
AQ 0.6425208 sec  
RG 186.93  
DW 9.800 usec  
DE 18.00 usec  
TE 298.0 K  
D1 2.0000000 sec  
D11 0.03000000 sec  
TD0 1

----- CHANNEL F1 -----  
SFO1 213.787656 MHz  
NUC1 13C  
P1 45.00 usec  
PLW1 12.00000000 W

----- CHANNEL F2 -----  
SFO2 850.1534006 MHz  
NUC2 1H  
CPDPRG2 waltz16  
PCPD2 80.00 usec  
PLW2 16.70000076 W  
PLW12 0.16700000 W  
PLW13 0.16888000 W

F2 - Processing parameters  
SI 32768  
SF 213.7704721 MHz  
WDW EM  
SFB 0  
LB 2.00 Hz  
GB 0  
PC 2.00

Figure S38. <sup>13</sup>C-NMR spectrum of compound 8e.



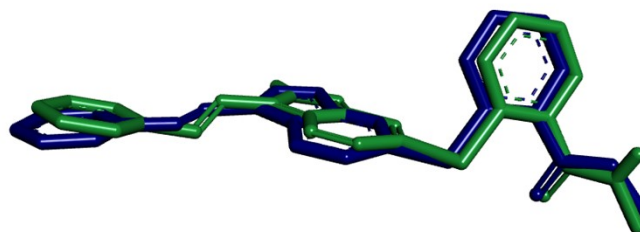

**Figure S39.** The superimposed conformations of the co-crystallized ligand **AXI** and its docked pose during molecular docking validation.

**Supplementary Table S1.** The MDS results of derivatives **2**, **5a-c**, **8a-c**, and **8e** using VEGFR-2 (PDB: 4AG8)

| Compound   | Binding energy (Kcal/mol) | Type of interaction | Interacting residues | Distance (Å) | Compound   | Binding energy (Kcal/mol) | Type of interaction | Interacting residues | Distance (Å) |        |      |
|------------|---------------------------|---------------------|----------------------|--------------|------------|---------------------------|---------------------|----------------------|--------------|--------|------|
| <b>AXI</b> | -9.90                     | H-Acceptor          | Asp1046              | 2.14         | <b>8a</b>  | -8.00                     | H-Acceptor          | Lys868               | 2.59         |        |      |
|            |                           | H-Donor             | Glu917               | 3.05         |            |                           | H-Acceptor          | Cys919               | 2.24         |        |      |
|            |                           | H-Donor             | Glu885               | 1.84         |            |                           | H-Acceptor          | Asp1046              | 1.86         |        |      |
|            |                           | Pi-Sigma            | Leu840               | 2.60         |            |                           | Pi-Pi T-shaped      | Phe1047              | 5.04         |        |      |
|            |                           | Pi-Sigma            | Lys868               | 2.63         |            |                           | Pi-Alkyl            | Leu840               | 4.27         |        |      |
|            |                           | Pi-Pi T-shaped      | Phe1047              | 5.00         |            |                           | Pi-Alkyl            | Ala866               | 5.12         |        |      |
|            |                           | Pi-Alkyl            | Val848               | 4.46         |            |                           | Pi-Alkyl            | Leu1035              | 4.60         |        |      |
|            |                           | Pi-Alkyl            | Val848               | 5.46         |            |                           | Pi-Alkyl            | Val848               | 4.43         |        |      |
|            |                           | Pi-Alkyl            | Ala866               | 4.23         |            |                           | Pi-Alkyl            | Ala866               | 4.50         |        |      |
|            |                           | Pi-Alkyl            | Ala866               | 3.51         |            |                           | Pi-Alkyl            | Val899               | 5.25         |        |      |
|            |                           | Pi-Alkyl            | Leu1035              | 4.67         |            |                           | Pi-Alkyl            | Leu1035              | 5.00         |        |      |
|            |                           | Pi-Alkyl            | Leu1035              | 4.38         |            |                           | Pi-Alkyl            | Cys1045              | 4.41         |        |      |
|            |                           | Pi-Alkyl            | Cys1045              | 4.76         |            |                           | <b>8b</b>           | -7.80                | H-Acceptor   | Lys868 | 2.41 |
|            |                           | Pi-Alkyl            | Cys919               | 4.69         |            |                           |                     |                      | H-Donor      | Glu917 | 2.21 |
| <b>2</b>   | -8.00                     | Pi-Alkyl            | Val916               | 3.97         | C-H Bond   | Lys868                    | 2.50                |                      |              |        |      |
|            |                           | H-Donor             | Asp1046              | 2.10         | H-Acceptor | Phe921                    | 3.02                |                      |              |        |      |
|            |                           | C-H Bond            | Gly922               | 2.55         | Pi-Alkyl   | Phe921                    | 4.95                |                      |              |        |      |
|            |                           | Pi-Sigma            | Phe1047              | 3.79         | Pi-Alkyl   | Leu840                    | 4.94                |                      |              |        |      |
|            |                           | Pi-Pi T-shaped      | Phe1047              | 5.47         | Pi-Alkyl   | Val848                    | 5.42                |                      |              |        |      |
|            |                           | Alkyl               | Leu889               | 4.96         | Pi-Alkyl   | Ala866                    | 4.38                |                      |              |        |      |
|            |                           | Pi-Alkyl            | Val848               | 4.97         | Pi-Alkyl   | Cys919                    | 5.33                |                      |              |        |      |
|            |                           | Pi-Alkyl            | Ala866               | 4.01         | Pi-Alkyl   | Leu1035                   | 4.20                |                      |              |        |      |
|            |                           | Pi-Alkyl            | Val899               | 5.45         | Pi-Alkyl   | Val848                    | 4.61                |                      |              |        |      |
|            |                           | Pi-Alkyl            | Leu1035              | 4.30         | Pi-Alkyl   | Ala866                    | 4.44                |                      |              |        |      |
|            |                           | Pi-Alkyl            | Cys1045              | 4.99         | Pi-Alkyl   | Val899                    | 4.72                |                      |              |        |      |
|            |                           | Pi-Alkyl            | Leu840               | 3.79         | Pi-Alkyl   | Val916                    | 4.58                |                      |              |        |      |
|            |                           | Pi-Alkyl            | Leu1035              | 5.32         | Pi-Alkyl   | Cys1045                   | 4.66                |                      |              |        |      |
|            |                           | <b>5a</b>           | -8.40                | H-Acceptor   | Lys868     | 2.42                      | Pi-Alkyl            | Leu840               | 5.29         |        |      |

|           |       |                |          |      |           |       |            |                  |      |
|-----------|-------|----------------|----------|------|-----------|-------|------------|------------------|------|
|           |       | H-Acceptor     | Cys919   | 2.70 | <b>8c</b> | -7.90 | H-Acceptor | Lys868           | 2.30 |
|           |       | H-Donor        | Glu917   | 2.18 |           |       | H-Donor    | Glu917           | 2.20 |
|           |       | H-Donor        | Glu885   | 2.14 |           |       | H-Donor    | Glu885           | 2.16 |
|           |       | Pi-Alkyl       | Leu840   | 5.12 |           |       | Amide-Pi   | Phe921:C,O;Gly92 | 4.93 |
|           |       |                |          |      |           |       | Stacked    | 2:N              |      |
|           |       | Pi-Alkyl       | Ala866   | 4.42 |           |       | Pi-Alkyl   | Phe918           | 5.07 |
|           |       | Pi-Alkyl       | Cys919   | 5.16 |           |       | Pi-Alkyl   | Leu840           | 4.96 |
|           |       | Pi-Alkyl       | Leu1035  | 4.04 |           |       | Pi-Alkyl   | Val848           | 5.43 |
|           |       | Pi-Alkyl       | Val848   | 4.73 |           |       | Pi-Alkyl   | Ala866           | 4.37 |
|           |       | Pi-Alkyl       | Ala866   | 4.46 |           |       | Pi-Alkyl   | Cys919           | 5.30 |
|           |       | Pi-Alkyl       | Val899   | 4.59 |           |       | Pi-Alkyl   | Leu1035          | 4.19 |
|           |       | Pi-Alkyl       | Val916   | 4.52 |           |       | Pi-Alkyl   | Val848           | 4.60 |
|           |       | Pi-Alkyl       | Cys1045  | 4.60 |           |       | Pi-Alkyl   | Ala866           | 4.43 |
|           |       | Pi-Alkyl       | Leu840   | 5.00 |           |       | Pi-Alkyl   | Val899           | 4.73 |
|           |       |                |          |      |           |       | Pi-Alkyl   | Val916           | 4.57 |
| <b>5b</b> | -7.90 | H-Acceptor     | Lys868   | 2.29 |           |       | Pi-Alkyl   | Cys1045          | 4.68 |
|           |       | H-Donor        | Glu917   | 2.43 |           |       | Pi-Alkyl   | Leu840           | 5.27 |
|           |       | H-Donor        | Glu885   | 2.23 |           |       |            |                  |      |
|           |       | Amide-Pi       | Phe921:C | 5.08 | <b>8e</b> | -8.40 | H-Acceptor | Lys868           | 2.31 |
|           |       | Stacked        | ,O;Gly92 |      |           |       |            |                  |      |
|           |       |                | 2N       |      |           |       |            |                  |      |
|           |       | Pi-Alkyl       | Leu840   | 5.02 |           |       | H-Acceptor | Asn923           | 2.82 |
|           |       | Pi-Alkyl       | Leu840   | 5.10 |           |       | H-Donor    | Glu917           | 2.34 |
|           |       | Pi-Alkyl       | Val848   | 5.34 |           |       | Pi-Alkyl   | Leu840           | 5.04 |
|           |       | Pi-Alkyl       | Val848   | 4.67 |           |       | Pi-Alkyl   | Leu840           | 5.20 |
|           |       | Pi-Alkyl       | Ala866   | 4.32 |           |       | Pi-Alkyl   | Val848           | 5.02 |
|           |       | Pi-Alkyl       | Ala866   | 4.42 |           |       | Pi-Alkyl   | Ala866           | 4.03 |
|           |       | Pi-Alkyl       | Cys919   | 5.36 |           |       | Pi-Alkyl   | Leu1035          | 4.34 |
|           |       | Pi-Alkyl       | Leu1035  | 4.19 |           |       | Pi-Alkyl   | Val848           | 4.92 |
|           |       | Pi-Alkyl       | Val899   | 4.65 |           |       | Pi-Alkyl   | Ala866           | 4.78 |
|           |       | Pi-Alkyl       | Val916   | 4.42 |           |       | Pi-Alkyl   | Val899           | 4.50 |
|           |       | Pi-Alkyl       | Cys1045  | 4.73 |           |       | Pi-Alkyl   | Val916           | 4.23 |
|           |       |                |          |      |           |       | Pi-Alkyl   | Cys1045          | 4.68 |
| <b>5c</b> | -7.90 | H-Acceptor     | Lys868   | 2.53 |           |       |            |                  |      |
|           |       | H-Acceptor     | Asn923   | 2.78 |           |       |            |                  |      |
|           |       | H-Acceptor     | Asp1046  | 2.04 |           |       |            |                  |      |
|           |       | H-Acceptor     | Leu840   | 2.86 |           |       |            |                  |      |
|           |       | Pi-Pi T-shaped | Phe1047  | 5.00 |           |       |            |                  |      |
